# Supplementary material
Source: PubMed Central journal article supplement (PMC3209165)
Supplement: supp_77.21.7551_AEM05463-11_sup01.pdf [file supp_77.21.7551_AEM05463-11_sup01.pdf]

**Table S1. Salt-responsive genes.**

| ID      | 7 min<br>Fold change | 45 min<br>Fold change | Gene ID | Description of <b>upregulated</b> genes                                              |
|---------|----------------------|-----------------------|---------|--------------------------------------------------------------------------------------|
| RSP0006 | 2.61                 | 3.46                  | 3720260 | DMT family permease                                                                  |
| RSP0018 | 2.47                 | 8.62                  | 3720153 | GntR family transcriptional regulator                                                |
| RSP0019 | 2.71                 | 8.22                  | 3720154 | hypothetical protein RSP_0019                                                        |
| RSP0091 | 2.50                 | 0.37                  | 3719922 | ABC sorbitol/mannitol transporter, periplasmic binding protein                       |
| RSP0100 | 2.93                 | 3.03                  | 3719932 | putative NADH dehydrogenase I chain A                                                |
| RSP0101 | 2.29                 | 3.44                  | 3719933 | NADH dehydrogenase (ubiquinone), 20 kDa subunit                                      |
| RSP0102 | NC                   | 2.26                  | 3719934 | bifunctional NADH:ubiquinone oxidoreductase subunit C/D                              |
| RSP0103 | NC                   | 2.81                  | 3719705 | NADH dehydrogenase subunit E                                                         |
| RSP0104 | NC                   | 2.87                  | 3719706 | respiratory-chain NADH dehydrogenase, 51 kDa subunit                                 |
| RSP0105 | NC                   | 2.12                  | 3719707 | NADH dehydrogenase subunit G                                                         |
| RSP0106 | NC                   | 2.14                  | 3719708 | putative NADH dehydrogenase I chain H                                                |
| RSP0107 | NC                   | 2.14                  | 3719709 | NADH dehydrogenase subunit I                                                         |
| RSP0108 | NC                   | 2.51                  | 3719710 | NADH dehydrogenase I chain J                                                         |
| RSP0109 | NC                   | 2.65                  | 3719711 | putative NADH dehydrogenase I chain K                                                |
| RSP0110 | NC                   | 2.00                  | 3719712 | NADH-ubiquinone oxidoreductase, chain 5                                              |
| RSP0123 | 2.18                 | NC                    | 3719690 | autoinducer synthesis protein                                                        |
| RSP0124 | 4.78                 | NC                    | 3719691 | hypothetical protein RSP_0124                                                        |
| RSP0152 | NC                   | 2.39                  | 3719572 | P-loop ATPase                                                                        |
| RSP0166 | 4.23                 | 2.52                  | 3719551 | DnaK suppressor protein                                                              |
| RSP0170 | 2.47                 | NC                    | 3719555 | hypothetical protein RSP_0170                                                        |
| RSP0171 | 5.82                 | 2.16                  | 3719498 | response regulator receiver protein                                                  |
| RSP0175 | 2.79                 | NC                    | 3719502 | lactate dehydrogenase and related dehydrogenase                                      |
| RSP0183 | NC                   | 2.29                  | 3719510 | phenylhydantoinase                                                                   |
| RSP0184 | 5.53                 | 2.67                  | 3719511 | allantoate amidohydrolase                                                            |
| RSP0187 | NC                   | 3.11                  | 3719514 | dihydropyrimidine dehydrogenase                                                      |
| RSP0189 | 6.77                 | 2.45                  | 3719516 | putative oxidoreductase                                                              |
| RSP0217 | 30.03                | 7.85                  | 3719375 | phage-related integrase                                                              |
| RSP0237 | 2.10                 | NC                    | 3719417 | acetylornithine deacetylase                                                          |
| RSP0243 | 2.16                 | NC                    | 3719385 | putative lipoprotein                                                                 |
| RSP0244 | NC                   | 2.05                  | 3719386 | glutamine amidotransferase                                                           |
| RSP0250 | 3.74                 | 2.20                  | 3719392 | hypothetical protein RSP_0250                                                        |
| RSP0254 | NC                   | 2.61                  | 3719396 | 1-deoxy-D-xylulose-5-phosphate synthase                                              |
| RSP0261 | NC                   | 3.19                  | 3719271 | chlorophyllide reductase, BchY subunit                                               |
| RSP0262 | NC                   | 2.33                  | 3719272 | chlorophyllide reductase, BchX subunit                                               |
| RSP0263 | NC                   | 2.98                  | 3719273 | chlorophyll synthesis pathway, bchC                                                  |
| RSP0264 | NC                   | 2.85                  | 3719274 | hydroxyneurosporene-O-methyltransferase                                              |
| RSP0266 | NC                   | 2.32                  | 3719276 | methoxyneurosporene dehydrogenase                                                    |
| RSP0269 | NC                   | 2.67                  | 3719278 | tryptophan rich sensory protein                                                      |
| RSP0270 | NC                   | 2.29                  | 3719279 | phytoene synthase                                                                    |
| RSP0271 | 2.30                 | 3.10                  | 3719280 | phytoene dehydrogenase                                                               |
| RSP0275 | NC                   | 2.26                  |         | putative protein                                                                     |
| RSP0278 | NC                   | 2.26                  | 3719287 | putative light-harvesting 1 (B870) complex assembly protein PucC                     |
| RSP0279 | NC                   | 2.24                  | 3719288 | bacteriochlorophyll/chlorophyll a synthase                                           |
| RSP0281 | NC                   | 2.25                  | 3719193 | magnesium-protoporphyrin IX monomethylester oxidative cyclase, 66 kDa subunit (bchE) |
| RSP0283 | NC                   | 2.38                  | 3719195 | regulatory protein, PpaA                                                             |

|         |       |       |                                                                   |
|---------|-------|-------|-------------------------------------------------------------------|
| RSP0284 | NC    | 2.02  | 3719196 2-vinyl bacteriochlorophyllide hydratase                  |
| RSP0285 | NC    | 2.00  | 3719197 light-independent protochlorophyllide reductase subunit N |
| RSP0316 | 2.14  | NC    | 3719076 LuxR family transcriptional regulator                     |
| RSP0319 | 2.26  | 2.81  | 3719079 NnrU                                                      |
| RSP0320 | 2.37  | 2.28  | 3719080 hypothetical protein RSP_0320                             |
| RSP0329 | 2.32  | 2.19  | 3719089 diguanylate cyclase with GAF sensor                       |
| RSP0351 | NC    | 2.38  | 3719032 D-threo-aldose 1-dehydrogenase                            |
| RSP0354 | 2.34  | NC    | 3719035 hypothetical protein RSP_0354                             |
| RSP0370 | NC    | 2.00  | 3718994 hypothetical protein RSP_0370                             |
| RSP0379 | 2.79  | 2.31  | 3718887 aminotransferase                                          |
| RSP0381 | NC    | 2.03  | 3718889 hypothetical protein                                      |
| RSP0402 | NC    | 2.18  | 3718871 TetR family transcriptional regulator                     |
| RSP0423 | NC    | 2.24  | 3718838 aldo/keto reductase                                       |
| RSP0427 | 2.43  | NC    | 3718842 hypothetical protein RSP_0427                             |
| RSP0442 | 2.84  | 3.43  | 3718815 putative aminotransferase                                 |
| RSP0443 | 2.59  | 2.81  | 3718816 BadM/Rrf2 family transcriptional regulator                |
| RSP0458 | 2.69  | NC    | 3718737 hypothetical protein RSP_0458                             |
| RSP0465 | NC    | 2.20  | 3718744 putative protease                                         |
| RSP0466 | NC    | 2.25  | 3718745 hypothetical protein RSP_0466                             |
| RSP0467 | NC    | 2.01  | 3718746 3-octaprenyl-4-hydroxybenzoate decarboxylase              |
| RSP0527 | NC    | 3.61  | 3718440 sigma-54 factor (RpoN1)                                   |
| RSP0589 | 3.12  | 3.58  | 3718003 hypothetical protein RSP_0589                             |
| RSP0590 | NC    | 2.35  | 3718005 hypothetical protein RSP_0590                             |
| RSP0601 | 3.58  | 4.29  | 3718015 RNA polymerase factor sigma-32                            |
| RSP0634 | NC    | 6.66  | 3718264 TRAP dicarboxylate family transporter DctM subunit        |
| RSP0635 | NC    | 17.70 | 3718265 TRAP dicarboxylate family transporter DctQ subunit        |
| RSP0636 | NC    | 12.12 | 3718266 TRAP dicarboxylate family transporter DctP subunit        |
| RSP0637 | NC    | 3.95  | 3718267 hypothetical protein RSP_0637                             |
| RSP0638 | NC    | 3.60  | 3718268 putative FAD dependent oxidoreductase protein             |
| RSP0639 | NC    | 5.47  | 3718288 putative N-methylhydantoinase B                           |
| RSP0640 | 23.44 | 7.10  | 3718289 putative N-methylhydantoinase A                           |
| RSP0641 | 4.51  | 2.84  | 3718290 XRE family transcriptional regulator                      |
| RSP0660 | NC    | 2.53  | 3718270 hypothetical protein RSP_0660                             |
| RSP0664 | NC    | 2.18  | 3718274 hypothetical protein RSP_0664                             |
| RSP0674 | NC    | 3.29  | 3718285 DNA polymerase III subunit delta'                         |
| RSP0685 | NC    | 2.58  | 3718335 16S rRNA m(2)G 1207 methyltransferase                     |
| RSP0686 | NC    | 2.23  | 3718336 ATP-dependent Clp protease adaptor protein clpS           |
| RSP0688 | 2.71  | NC    | 3718338 penicillin-binding protein                                |
| RSP0697 | NC    | 2.49  | 3718175 universal stress protein                                  |
| RSP0723 | 2.91  | NC    | 3718087 L-alanine dehydrogenase                                   |
| RSP0724 | NC    | 2.08  | 3718088 large-conductance mechanosensitive channel                |
| RSP0751 | 4.00  | NC    | 3718116 hypothetical protein RSP_0751                             |
| RSP0753 | 2.06  | 9.87  | 3718120 Salt-stress induced outer membrane protein                |
| RSP0760 | 4.29  | 3.45  | 3718128 MarR family transcriptional regulator                     |
| RSP0761 | 3.93  | 3.43  | 3718129 hypothetical protein RSP_0761                             |
| RSP0762 | 4.74  | 3.19  | 3718130 XRE family transcriptional regulator                      |
| RSP0765 | 3.18  | 2.29  | 3718133 SAM-dependent methyltransferase                           |
| RSP0766 | 7.38  | 3.53  | 3718134 hypothetical protein RSP_0766                             |
| RSP0769 | 3.07  | NC    | 3718137 glutathione S-transferase                                 |
| RSP0775 | 2.18  | NC    | 3718141 class I monoheme cytochrome c                             |
| RSP0785 | 2.54  | NC    | 3718151 putative heat shock protein DnaJ                          |
| RSP0786 | 3.05  | 2.79  | 3718152 endonuclease/exonuclease/phosphatase fa                   |

|         |       |       |                                                                             |
|---------|-------|-------|-----------------------------------------------------------------------------|
| RSP0846 | NC    | 2.21  | 3718152 endonuclease/exonuclease/phosphatase family                         |
| RSP0850 | NC    | 2.46  | 3718311 GTP cyclohydrolase II                                               |
| RSP0864 | NC    | 2.22  | 3718316 hypothetical protein RSP_0850                                       |
| RSP0865 | 2.87  | NC    | 3718218 hypothetical protein RSP_0864                                       |
| RSP0866 | 4.59  | NC    | 3718220 hypothetical protein RSP_0866                                       |
| RSP0868 | 7.19  | 2.24  | 3718222 putative transcriptional regulator                                  |
| RSP0880 | NC    | 2.01  | 3718348 oxidoreductase                                                      |
| RSP0887 | NC    | 2.02  | 3718356 glycosyl transferase family protein                                 |
| RSP0935 | NC    | 2.12  | 3717922 MiaB-like radical SAM protein                                       |
| RSP0936 | NC    | 2.27  | 3717923 diaminopimelate epimerase                                           |
| RSP0937 | 2.19  | NC    | 3720765 alpha amylase domain-containing protein                             |
| RSP0938 | 2.50  | 2.40  | 3720766 hypothetical protein RSP_0938                                       |
| RSP0940 | NC    | 2.38  | 3720768 ABC transporter, periplasmic substrate binding protein              |
| RSP0948 | 2.81  | 16.19 | 3720777 OtsA trehalose-6-phosphate synthase                                 |
| RSP0949 | 6.45  | 11.77 | 3720778 putative trehalose-6-phosphate phosphatase                          |
| RSP0959 | NC    | 2.50  | 3720750 ATPase                                                              |
| RSP0989 | 4.70  | NC    | 3720743 ABC sugar transporter, inner membrane subunit                       |
| RSP0990 | 14.33 | NC    | 3720744 ABC sugar transporter, periplasmic sugar binding subunit            |
| RSP0991 | 4.26  | NC    | 3720707 ROK family transcriptional regulator                                |
| RSP1007 | NC    | 2.15  | 3720723 16S ribosomal RNA methyltransferase RsmE                            |
| RSP1025 | NC    | 3.18  | 3720993 hypothetical protein RSP_1025                                       |
| RSP1026 | NC    | 2.57  | 3720994 hypothetical protein RSP_1026                                       |
| RSP1078 | 2.08  | NC    | 3720893 formate dehydrogenase subunit gamma                                 |
| RSP1083 | 3.73  | NC    | 3720842 two component transcriptional regulator                             |
| RSP1094 | NC    | 2.87  | 3720853 hypothetical protein RSP_1094                                       |
| RSP1095 | 8.20  | 4.77  | 3720854 DNA mismatch repair protein                                         |
| RSP1125 | 2.10  | NC    | 3720823 membrane bound lytic murein transglycosylase B                      |
| RSP1133 | 3.44  | NC    | 3720831 hypothetical protein RSP_1133                                       |
| RSP1139 | 2.52  | NC    | 3720837 MarR family transcriptional regulator                               |
| RSP1141 | 2.78  | 2.16  | 3720839 hypothetical protein RSP_1141                                       |
| RSP1180 | 2.35  | 0.35  | 3718173 ABC sugar (xylose) transporter, periplasmic binding protein         |
| RSP1184 | 5.70  | 3.94  | 3718848 ribonuclease BN                                                     |
| RSP1191 | NC    | 2.12  | 3718855 MarR family transcriptional regulator                               |
| RSP1204 | NC    | 2.94  | 3720232 ABC multidrug efflux pump, fused ATPase and inner membrane subunits |
| RSP1220 | 3.85  | NC    | 3719668 heat-inducible transcription repressor                              |
| RSP1233 | NC    | 2.50  | 3719681 putative Maf/YceF/YhdE family protein                               |
| RSP1254 | NC    | 2.44  | 3718552 acetate kinase                                                      |
| RSP1255 | NC    | 3.61  | 3718553 bifunctional enoyl-CoA hydratase/phosphate acetyltransferase        |
| RSP1256 | NC    | 3.59  | 3718554 enoyl-(acyl carrier protein) reductase                              |
| RSP1257 | 3.47  | 3.58  | 3718555 putative polyhydroxyalkanoic synthase, PHA synthase                 |
| RSP1261 | 2.38  | NC    | 3718464 BLUF blue-light receptor                                            |
| RSP1270 | NC    | 3.46  | 3718473 hypothetical protein RSP_1270                                       |
| RSP1271 | NC    | 3.59  | 3718474 periplasmic sensor signal transduction histidine kinase             |
| RSP1272 | 5.44  | 4.41  | 3718475 RNA polymerase sigma factor                                         |
| RSP1273 | 3.76  | 2.79  | 3718476 hypothetical protein RSP_1273                                       |
| RSP1274 | 2.83  | 2.36  | 3718477 two-component response regulator                                    |

|         |       |      |                                                                                                 |
|---------|-------|------|-------------------------------------------------------------------------------------------------|
| RSP1275 | 3.10  | 4.57 | 3718479 CrpO                                                                                    |
| RSP1276 | 7.43  | 8.97 | 3718480 hypothetical protein RSP_1276                                                           |
| RSP1286 | 7.61  | 3.63 | 3718200 RuBisCO operon transcriptional regulator, CbbR                                          |
| RSP1297 | NC    | 2.52 | 3718211 LysR family transcriptional regulator                                                   |
| RSP1308 | 5.01  | 3.03 | 3720969 hypothetical protein RSP_1308                                                           |
| RSP1345 | 2.32  | NC   | 3720871 hypothetical protein RSP_1345                                                           |
| RSP1382 | NC    | 3.66 | 3720789 radical SAM superfamily protein                                                         |
| RSP1385 | 2.42  | 2.54 | 3720792 hypothetical protein RSP_1385                                                           |
| RSP1403 | 2.21  | NC   | 3718491 hypothetical protein RSP_1403                                                           |
| RSP1422 | 2.12  | NC   | 3721987 ParB-like nuclease                                                                      |
| RSP1423 | 8.06  | NC   | 3721988 ParA family ATPase                                                                      |
| RSP1425 | 6.32  | 2.58 | 3721989 plasmid replication initiation protein                                                  |
| RSP1428 | 2.35  | NC   | 3718797 Pre (Mob) type recombination enzyme                                                     |
| RSP1430 | 7.28  | 2.66 | 3718798 hypothetical protein RSP_1430                                                           |
| RSP1433 | 5.74  | 4.81 | 3718800 hypothetical protein RSP_1433                                                           |
| RSP1434 | 17.09 | 7.08 | 3718801 putative Zn-dependent oxidoreductase                                                    |
| RSP1435 | 38.77 | 5.58 | 3718802 TetR family regulatory protein                                                          |
| RSP1436 | 9.13  | NC   | 3718803 ABC transporter ATPase                                                                  |
| RSP1437 | 2.03  | NC   | 3718804 ABC Fe+3 hydroxamate (ferrichrome) transporter, ATPase subunit                          |
| RSP1439 | 2.42  | NC   | 3718772 ABC Fe+3 hydroxamate (ferrichrome) transporter, periplasmic siderophore binding protein |
| RSP1441 | 2.22  | NC   | 3718774 GntR family regulatory protein                                                          |
| RSP1442 | 2.16  | NC   | 3718775 ABC sugar transporter, periplasmic sugar-binding protein                                |
| RSP1443 | 2.39  | NC   | 3718776 ABC sugar transporter, inner membrane subunit                                           |
| RSP1467 | NC    | 2.02 | 3718762 alkane 1-monooxygenase                                                                  |
| RSP1471 | NC    | 2.64 | 3718765 hypothetical protein RSP_1471                                                           |
| RSP1473 | 2.51  | NC   | 3718768 hypothetical protein RSP_1473                                                           |
| RSP1486 | 13.04 | 3.32 | 3718723 TetR family transcriptional regulator                                                   |
| RSP1487 | 6.75  | NC   | 3718724 hypothetical protein RSP_1487                                                           |
| RSP1488 | 5.35  | NC   | 3718725 glyoxalase                                                                              |
| RSP1490 | NC    | 2.01 | 3718727 putative ATP-dependent protease La, LON                                                 |
| RSP1496 | 2.89  | NC   | 3718696 hypothetical protein RSP_1496                                                           |
| RSP1502 | 2.77  | 2.29 | 3718701 GAF domain-containing protein                                                           |
| RSP1551 | 2.86  | NC   | 3718618 putative glyoxalase family protein                                                      |
| RSP1607 | 3.96  | NC   | 3718560 GntR family transcriptional regulator                                                   |
| RSP1624 | 6.63  | 2.13 | 3718520 hypothetical protein RSP_1624                                                           |
| RSP1666 | NC    | 2.07 | 3717932 4-hydroxy-3-methylbut-2-enyl diphosphate reductase                                      |
| RSP1706 | NC    | 2.01 | 3718905 putative acetyltransferase                                                              |
| RSP1759 | NC    | 3.17 | 3718965 hypothetical protein RSP_1759                                                           |
| RSP1760 | NC    | 3.62 | 3718966 hypothetical protein RSP_1760                                                           |
| RSP1769 | NC    | 2.03 | 3718975 mandelate racemase/muconate lactonizing protein                                         |
| RSP1770 | 2.69  | 2.98 | 3718976 hypothetical protein                                                                    |
| RSP1785 | NC    | 2.18 | 3719011 LacI family transcription regulator                                                     |
| RSP1786 | 2.58  | NC   | 3719012 phosphoenolpyruvate--protein phosphotransferase                                         |
| RSP1790 | 2.70  | 2.18 | 3719016 transcriptional regulator                                                               |
| RSP1812 | 2.12  | NC   | 3719058 hypothetical protein                                                                    |
| RSP1860 | NC    | 2.64 | 3719127 hypothetical protein RSP_1860                                                           |
| RSP1873 | 2.60  | 3.80 | 3719141 hypothetical protein RSP_1873                                                           |
| RSP1890 | 4.62  | 4.80 | 3719177 LysR family transcriptional regulator                                                   |
| RSP1895 | NC    | 2.95 | 3719182 small-conductance mechanosensitive ion channel                                          |



|         |       |      |                                                                      |
|---------|-------|------|----------------------------------------------------------------------|
| RSP1896 | 2.41  | NC   | 3719183 guanine deaminase                                            |
| RSP1926 | NC    | 2.18 | 3719235 tRNA-dihydrouridine synthase A                               |
| RSP1938 | 3.97  | 3.62 | 3719248 hypothetical protein RSP_1938                                |
| RSP1945 | 11.31 | 6.55 | 3719255 AsnC family transcriptional regulator                        |
| RSP1952 | 2.91  | 3.11 | 3719262 cold-shock DNA-binding protein family protein                |
| RSP1956 | NC    | 2.57 | 3719266 hypothetical protein RSP_1956                                |
| RSP1963 | 2.07  | NC   | 3719293 hypothetical protein RSP_1963                                |
| RSP1966 | 3.19  | 2.02 | 3719297 ISSod13, transposase                                         |
| RSP1973 | 2.27  | 3.06 | 3719304 SufE protein                                                 |
| RSP1974 | 2.05  | 2.96 | 3719305 hypothetical protein RSP_1974                                |
| RSP1990 | 5.08  | NC   | 3719323 AsnC family transcriptional regulator                        |
| RSP1997 | 2.34  | NC   | 3719330 LexA repressor                                               |
| RSP2007 | NC    | 2.09 | 3719340 hypothetical protein RSP_2007                                |
| RSP2024 | 2.40  | 2.15 | 3719358 cold-shock DNA-binding protein family protein                |
| RSP2038 | NC    | 2.71 | 3719428 acetyltransferase                                            |
| RSP2053 | 2.16  | NC   | 3719442 RarD family protein                                          |
| RSP2075 | 3.96  | NC   | 3719468 putative transcriptional regulator                           |
| RSP2084 | NC    | 2.01 | 3719517 hypothetical protein RSP_2084                                |
| RSP2085 | NC    | 2.69 | 3719518 hypothetical protein RSP_2085                                |
| RSP2087 | NC    | 3.27 | 3719520 hypothetical protein RSP_2087                                |
| RSP2092 | 3.21  | 2.52 | 3719525 ATP-dependent DNA helicase Rep                               |
| RSP2111 | 3.73  | NC   | 3719582 D-alanine--D-alanine ligase                                  |
| RSP2115 | 2.44  | 3.37 | 3719586 UDP-3-O-[3-hydroxymyristoyl] N-acetylglucosamine deacetylase |
| RSP2123 | 3.87  | 2.55 | 3719593 radical SAM domain-containing protein                        |
| RSP2171 | 3.36  | NC   | 3719640 LysR family transcriptional regulator                        |
| RSP2186 | NC    | 3.04 | 3719656 MerR family transcriptional regulator                        |
| RSP2231 | 11.52 | 5.40 | 3719761 hypothetical protein RSP_2231                                |
| RSP2234 | 4.96  | 2.44 | 3719763 DNA-binding protein                                          |
| RSP2236 | NC    | 2.83 | 3719765 MarR family transcriptional regulator                        |
| RSP2237 | NC    | 2.95 | 3719766 membrane fusion protein (MFP) family protein                 |
| RSP2238 | NC    | 3.21 | 3719767 major facilitator superfamily multidrug-efflux transporter   |
| RSP2286 | 2.06  | NC   | 3719818 hypothetical protein                                         |
| RSP2305 | 2.82  | NC   | 3719836 MaoC family protein                                          |
| RSP2312 | NC    | 2.14 | 3719843 hypothetical protein RSP_2312                                |
| RSP2320 | NC    | 2.29 | 3719851 TRAP-T family transporter periplasmic binding protein        |
| RSP2321 | NC    | 2.52 | 3719852 TRAP-T family transporter                                    |
| RSP2322 | NC    | 2.45 | 3719853 TRAP dicarboxylate family transporter DctQ subunit           |
| RSP2323 | 3.42  | 3.42 | 3719854 hypothetical protein RSP_2323                                |
| RSP2324 | 2.12  | NC   | 3719855 RpiR family transcriptional regulator                        |
| RSP2331 | NC    | 2.00 | 3719863 PpaZ, a novel pseudoazurin precursor (blue copper protein)   |
| RSP2334 | 2.35  | NC   | 3719866 6-phosphofructokinase                                        |
| RSP2338 | 4.58  | 5.40 | 3719871 hypothetical protein RSP_2338                                |
| RSP2339 | 2.82  | 2.51 | 3719872 hypothetical protein RSP_2339                                |
| RSP2348 | 3.96  | 3.36 | 3719882 hypothetical protein RSP_2348                                |
| RSP2349 | 16.19 | 5.11 | 3719884 hypothetical protein RSP_2349                                |
| RSP2350 | 14.36 | 4.03 | 3719885 hypothetical protein RSP_2350                                |
| RSP2378 | NC    | 2.64 | 3719914 putative fatty acid beta hydroxylase (cytochrome P450)       |
| RSP2379 | 9.34  | 8.15 | 3719915 hypothetical protein                                         |

|         |       |      |                                                                          |
|---------|-------|------|--------------------------------------------------------------------------|
| RSP2380 | NC    | 2.89 | 3719974 catalase                                                         |
| RSP2384 | NC    | 2.16 | 3719981 hypothetical protein RSP_2384                                    |
| RSP2395 | 5.61  | 5.68 | 3719992 BCCP, cytochrome c peroxidase                                    |
| RSP2414 | NC    | 2.19 | 3719992 BCCP, cytochrome c peroxidase                                    |
| RSP2425 | 3.11  | NC   | 3720022 CarD family transcriptional regulator                            |
| RSP2445 | NC    | 5.15 | 3720042 putative Alpha amylase                                           |
| RSP2446 | NC    | 3.49 | 3720043 putative trehalose synthase                                      |
| RSP2448 | NC    | 2.89 | 3720044 glycogen branching enzyme                                        |
| RSP2449 | NC    | 2.23 | 3720045 putative glycosyl hydrolase                                      |
| RSP2476 | 4.24  | 2.28 | 3720093 hypothetical protein RSP_2476                                    |
| RSP2481 | 2.32  | 2.22 | 3720098 serine O-acetyltransferase                                       |
| RSP2482 | NC    | 2.34 | 3711864 TonB-dependent receptor protein                                  |
| RSP2484 | 5.11  | 2.17 | 3711861 hypothetical protein RSP_2484                                    |
| RSP2505 | NC    | 2.69 | 3720064 CreA family protein                                              |
| RSP2506 | 4.75  | 4.77 | 3720065 isovaleryl-CoA dehydrogenase                                     |
| RSP2508 | NC    | 3.34 | 3720067 methylcrotonyl-CoA carboxylase beta chain                        |
| RSP2509 | NC    | 3.16 | 3720068 3-methylcrotonoyl-CoA carboxylase, alpha subunit                 |
| RSP2510 | NC    | 3.60 | 3720069 hydroxymethylglutaryl-CoA lyase                                  |
| RSP2511 | NC    | 3.17 | 3720070 enoyl-CoA hydratase                                              |
| RSP2543 | 2.29  | NC   | 3720178 peptidoglycan-binding LysM ( peptidase)                          |
| RSP2547 | 2.80  | NC   | 3720181 exopolysaccharide production protein exoY                        |
| RSP2548 | 2.23  | NC   | 3720182 Outer membrane polysaccharide export protein, exoF               |
| RSP2555 | 2.18  | NC   | 3720189 hypothetical protein RSP_2555                                    |
| RSP2563 | NC    | 2.15 | 3720197 glycosyl transferase family protein                              |
| RSP2572 | NC    | 2.04 | 3720205 crpK, Fnr-type transcriptional regulator                         |
| RSP2591 | 4.64  | NC   | 3720224 two component LuxR family transcriptional regulator              |
| RSP2599 | NC    | 2.96 | 3720271 phosphate regulon transcriptional regulator, PhoR                |
| RSP2600 | NC    | 2.14 | 3720272 phosphate uptake regulator, PhoU                                 |
| RSP2601 | NC    | 2.59 | 3720273 ABC phosphate transporter, ATPase subunit PstB                   |
| RSP2602 | NC    | 2.24 | 3720274 ABC phosphate transporter, inner membrane subunit PstA           |
| RSP2603 | NC    | 2.77 | 3720275 ABC phosphate transporter, inner membrane subunit PstC           |
| RSP2604 | 3.61  | 4.38 | 3720276 ABC phosphate transporter, periplasmic phosphate-binding protein |
| RSP2610 | 3.99  | NC   | 3720283 MerR family transcriptional regulator                            |
| RSP2611 | 4.67  | NC   | 3720284 integration host factor subunit alpha                            |
| RSP2624 | 16.44 | 8.10 | 3720297 hypothetical protein                                             |
| RSP2629 | NC    | 2.11 | 3720301 tRNA (uracil-5-)-methyltransferase Gid                           |
| RSP2655 | 2.20  | NC   | 3720347 hypothetical protein RSP_2655                                    |
| RSP2670 | 4.08  | NC   | 3720360 glycerol-3-phosphate dehydrogenase                               |
| RSP2674 | 3.36  | 5.79 | 3720364 hypothetical protein RSP_2674                                    |
| RSP2681 | 8.35  | 5.55 | 3720372 sigma factor, RpoE                                               |
| RSP2688 | NC    | 2.11 | 3720379 putative sarcosine oxidase delta subunit protein                 |
| RSP2692 | 4.68  | 2.76 | 3720421 acyltransferase domain-containing protein                        |
| RSP2709 | NC    | 3.27 | 3720438 1-deoxy-D-xylulose 5-phosphate reductoisomerase                  |
| RSP2722 | 3.72  | 3.40 | 3720452 cysteinyl-tRNA synthetase                                        |
| RSP2723 | NC    | 2.33 | 3720453 putative alpha-isopropylmalate/homocitrate synthase              |
| RSP2729 | 2.27  | NC   | 3720459 restriction endonuclease                                         |
| RSP2741 | NC    | 3.68 | 3720471 class I diheme cytochrome c4                                     |
| RSP2763 | 9.26  | 7.24 | 3720494 hypothetical protein RSP_2763                                    |
| RSP2764 | 8.78  | 7.55 | 3720495 hypothetical protein RSP_2764                                    |

|         |       |       |                                                                                        |
|---------|-------|-------|----------------------------------------------------------------------------------------|
| RSP2765 | 8.37  | 3.08  | 3720496 hypothetical protein RSP_2765                                                  |
| RSP2771 | 2.79  | NC    | 3720504 putative exopolyphosphatase                                                    |
| RSP2780 | 3.75  | 2.38  | 3720513 LysR family transcriptional regulator                                          |
| RSP2787 | NC    | 2.32  | 3720520 hypothetical protein RSP_2787                                                  |
| RSP2801 | 16.04 | 4.65  | 3720592 TetR family transcriptional regulator                                          |
| RSP2802 | 2.92  | 2.13  | 3720591 multidrug/cation efflux pump, membrane fusion                                  |
| RSP2839 | NC    | 2.07  | 3720547 nitrogen regulation protein, NtrY, Signal transduction                         |
| RSP2847 | 3.24  | NC    | 3720539 hypothetical protein RSP_2847                                                  |
| RSP2864 | NC    | 2.67  | 3720523 ribulose-5-phosphate 3-epimerase                                               |
| RSP2865 | 2.23  | 2.51  | 3720522 putative transposase                                                           |
| RSP2932 | 2.12  | NC    | 3720672 GntR family transcriptional regulator                                          |
| RSP2933 | 7.39  | NC    | 3720673 N-formimino-L-glutamate deiminase                                              |
| RSP2934 | 2.47  | NC    | 3720674 imidazolonepropionase                                                          |
| RSP2961 | 3.47  | NC    | 3720414 CBS domain-containing proteins                                                 |
| RSP2982 | NC    | 2.20  | 3720396 4-hydroxy-3-methylbut-2-en-1-yl diphosphate synthase                           |
| RSP3004 | 2.38  | 4.53  | 3721591 protein kinase                                                                 |
| RSP3006 | 6.71  | 4.45  | 3721593 hypothetical protein RSP_3006                                                  |
| RSP3007 | 4.45  | NC    | 3721594 hypothetical protein RSP_3007                                                  |
| RSP3014 | 2.19  | NC    | 3721599 putative aldolase protein                                                      |
| RSP3018 | 2.44  | NC    | 3721603 putative acyl-CoA dehydrogenase                                                |
| RSP3021 | 2.59  | NC    | 3721606 putative catechol 2,3-dioxygenase                                              |
| RSP3022 | 8.49  | NC    | 3721607 TetR family transcriptional regulator                                          |
| RSP3023 | 2.15  | NC    | 3721608 hypothetical protein RSP_3023                                                  |
| RSP3025 | 8.43  | NC    | 3721609 NAD(P)H oxidoreductase                                                         |
| RSP3039 | NC    | 2.04  | 3721624 ABC permidine/putrescine transporter, inner membrane subunit                   |
| RSP3041 | 2.84  | NC    | 3721626 ABC permidine/putrescine transporter, ATPase subunit                           |
| RSP3042 | NC    | 2.99  | 3721627 LuxR family transcriptional regulator                                          |
| RSP3057 | NC    | 17.45 | 3721644 ABC proline/glycine betaine transporter, ATPase subunit                        |
| RSP3058 | 3.73  | 56.40 | 3721645 ABC proline/glycine betaine transporter, inner                                 |
| RSP3059 | 8.86  | 53.55 | 3721646 ABC proline/glycine betaine transporter, periplasmic substrate-binding protein |
| RSP3060 | NC    | 4.23  | 3721647 O-acetylserine synthase                                                        |
| RSP3061 | NC    | 3.22  | 3721648 hypothetical protein RSP_3061                                                  |
| RSP3062 | NC    | 5.50  | 3721649 3-oxoacyl-(acyl-carrier-protein) reductase                                     |
| RSP3070 | NC    | 3.17  | 3721347 hypothetical protein RSP_3070                                                  |
| RSP3075 | NC    | 3.52  | 3721351 hypothetical protein RSP_3075                                                  |
| RSP3076 | NC    | 2.61  | 3721352 hypothetical protein RSP_3076                                                  |
| RSP3080 | NC    | 4.03  | 3721356 BCCT family choline/carnitine/betaine transporter                              |
| RSP3113 | 2.29  | 5.59  | 3721388 D-amino acid dehydrogenase small subunit                                       |
| RSP3124 | 3.60  | 2.65  | 3721579 LysR family transcriptional regulator                                          |
| RSP3125 | 10.22 | 2.93  | 3721580 ArsR family transcriptional regulator                                          |
| RSP3126 | 2.80  | NC    | 3721581 ACR3 family arsenite efflux pump                                               |
| RSP3168 | 4.22  | NC    | 3721460 ABC transporter, periplasmic binding protein                                   |
| RSP3170 | 2.35  | NC    | 3721462 demethylmenaquinone methyltransferase                                          |
| RSP3179 | 10.59 | 3.39  | 3721470 ferric-uptake regulator                                                        |
| RSP3180 | 4.36  | NC    | 3721471 transglutaminase-like enzyme                                                   |
| RSP3225 | NC    | 2.12  | 3721832 periplasmic sensor signal transduction histidine kinase                        |
| RSP3226 | 2.32  | NC    | 3721833 NAD-dependent deacetylase                                                      |

|         |       |      |         |                                                                         |
|---------|-------|------|---------|-------------------------------------------------------------------------|
| RSP3272 | NC    | 3.17 | 3721873 | gamma-glutamyltransferase 1                                             |
| RSP3290 | 2.61  | NC   | 3721890 | ABC glycerol-3-phosphate transporter, periplasmic binding protein, UgpB |
| RSP3291 | 2.29  | 2.27 | 3721991 | putative Na <sup>+</sup> /phosphate symporter                           |
| RSP3297 | 2.39  | NC   | 3721998 | ABC branched-chain amino acid transporter, periplasmic binding protein  |
| RSP3305 | 2.52  | 2.72 | 3722007 | putative ubiquinol-cytochrome-c reductase assembly protein              |
| RSP3324 | 2.38  | 2.51 | 3722024 | LuxR family transcriptional regulator                                   |
| RSP3351 | 2.20  | 6.06 | 3722051 | hypothetical protein RSP_3351                                           |
| RSP3353 | NC    | 3.37 | 3722055 | Phage related tail protein                                              |
| RSP3378 | 7.86  | 4.96 | 3722080 | hypothetical protein RSP_3378                                           |
| RSP3379 | 6.04  | 2.71 | 3722081 | hypothetical protein RSP_3379                                           |
| RSP3384 | NC    | 2.49 | 3721669 | mandelate racemase/muconate lactonizing enzyme family protein           |
| RSP3385 | 2.11  | NC   | 3721670 | LysR family transcriptional regulator                                   |
| RSP3386 | 2.12  | NC   | 3721671 | TRAP-T family transporter periplasmic binding protein                   |
| RSP3405 | 2.14  | NC   | 3721690 | GntR family transcriptional regulator                                   |
| RSP3410 | 2.44  | NC   | 3721695 | TRAP-T family transporter periplasmic binding protein                   |
| RSP3411 | 5.71  | NC   | 3721696 | TRAP-T family transporter small inner membrane subunit                  |
| RSP3453 | 3.34  | NC   | 3721739 | TRAP-T family transporter periplasmic binding protein                   |
| RSP3494 | 2.60  | NC   | 3721909 | OmpA/MotB domain-containing protein                                     |
| RSP3503 | 2.01  | NC   | 3721920 | sugar ABC transporter ATPase                                            |
| RSP3509 | 3.04  | NC   | 3721925 | hemolysin-type calcium-binding region, RTX                              |
| RSP3537 | NC    | 2.98 | 3721951 | alcohol dehydrogenase, zinc-containing                                  |
| RSP3538 | 2.57  | NC   | 3721952 | hypothetical protein RSP_3538                                           |
| RSP3547 | 2.22  | 2.72 | 3721961 | ribonucleotide reductase                                                |
| RSP3569 | NC    | 2.00 | 3722084 | Zinc-uptake regulator, Zur                                              |
| RSP3594 | NC    | 3.03 | 3722111 | antifreeze protein, type I                                              |
| RSP3604 | NC    | 2.30 | 3721762 | tRNA 2-selenouridine synthase                                           |
| RSP3606 | 4.15  | 3.15 | 3721764 | sigma-54 factor (RpoN3)                                                 |
| RSP3619 | 2.04  | NC   | 3721786 | hypothetical protein                                                    |
| RSP3621 | 2.78  | 3.23 | 3721788 | cold-shock DNA-binding protein                                          |
| RSP3632 | 2.72  | NC   | 3722121 | hypothetical protein RSP_3632                                           |
| RSP3634 | 13.21 | 4.87 | 3722123 | hypothetical protein RSP_3634                                           |
| RSP3646 | 10.86 | 3.47 | 3722135 | DNA topology modulation kinase FlaR, putative                           |
| RSP3661 | NC    | 2.06 | 3722150 | TRAP-T family transporter periplasmic binding protein                   |
| RSP3662 | 2.21  | NC   | 3722151 | TRAP-T family transporter large inner membrane subunit                  |
| RSP3663 | 5.82  | NC   | 3722152 | TRAP-T family transporter small inner membrane subunit                  |
| RSP3675 | 4.24  | NC   | 3722164 | esterase/lipase/thioesterase                                            |
| RSP3676 | 6.91  | NC   | 3722165 | GntR family transcriptional regulator                                   |
| RSP3677 | 3.94  | NC   | 3722166 | ABC sugar transporter, ATPase subunit                                   |
| RSP3700 | 2.92  | NC   | 3722190 | Lacl family transcription regulator                                     |
| RSP3701 | 8.40  | 0.42 | 3722191 | ABC sugar transporter, periplasmic binding protein                      |
| RSP3702 | 4.14  | NC   | 3722192 | ABC sugar transporter, ATPase subunit                                   |
| RSP3731 | 3.36  | NC   | 3721492 | DeoR family transcriptional regulator                                   |



|         |       |       |                                                                              |
|---------|-------|-------|------------------------------------------------------------------------------|
| RSP3732 | 4.31  | NC    | 3721493 ABC sugar transporter, periplasmic binding protein                   |
| RSP3808 | 2.94  | NC    | 3721661 hypothetical protein RSP_3808                                        |
| RSP3812 | 2.39  | NC    | 3722118 recombinase                                                          |
| RSP3814 | 4.93  | NC    | 3721395 hypothetical protein RSP_3814                                        |
| RSP3816 | 3.46  | NC    | 3721396 hypothetical protein RSP_3816                                        |
| RSP3821 | 5.27  | 4.30  | 3721402 putative acetyltransferase                                           |
| RSP3822 | 2.25  | NC    | 3721403 GTPase ObgE                                                          |
| RSP3823 | 2.69  | NC    | 3721404 gamma-glutamyl kinase                                                |
| RSP3824 | 2.12  | NC    | 3721405 glutamate-5-semialdehyde dehydrogenase                               |
| RSP3833 | 2.36  | NC    | 3721415 enoyl-CoA hydratase                                                  |
| RSP3840 | 11.96 | 4.90  | 4796457 ATPase, ParA type                                                    |
| RSP3860 | 3.25  | NC    | 4796542 sulfate/molybdate ABC transporter inner membrane protein             |
| RSP3861 | 4.24  | NC    | 4796445 sulfate/molybdate ABC transporter periplasmic ligand-binding protein |
| RSP3865 | 2.78  | 2.73  | 4796516 BadM/Rrf2 family transcriptional regulator                           |
| RSP3866 | NC    | 3.24  | 4796539 hypothetical protein RSP_3866                                        |
| RSP3927 | 3.90  | 11.65 | 4796463 hypothetical protein RSP_3927                                        |
| RSP3970 | 2.79  | NC    | 3712014 3-hydroxyacyl-CoA dehydrogenase                                      |
| RSP3971 | 3.56  | 2.62  | 3712013 GntR family transcriptional regulator                                |
| RSP3972 | 3.39  | 2.45  | 3712012 3-ketoacyl-(acyl-carrier-protein) reductase                          |
| RSP3974 | NC    | 2.04  | 3711824 transketolase                                                        |
| RSP3981 | NC    | 2.39  | 3711816 hypothetical protein RSP_3981                                        |
| RSP4000 | 3.22  | NC    | 3711787 glycine betaine/L-proline ABC transporter ATPase                     |
| RSP4022 | NC    | 2.33  | 3712039 ParB-like partition protein                                          |
| RSP4023 | NC    | 2.95  | 3712038 ATPase, ParA type                                                    |
| RSP4024 | NC    | 2.38  | 3712037 hypothetical protein RSP_4024                                        |
| RSP4037 | 6.31  | NC    | 3711799 ABC sugar transporter, periplasmic ligand binding protein            |
| RSP4038 | 3.51  | NC    | 3711798 DeoR family transcriptional regulator                                |
| RSP4047 | 2.26  | 2.48  | 3720101 pyruvate dehydrogenase E1 component, alpha subunit                   |
| RSP4049 | NC    | 2.60  | 3720100 pyruvate dehydrogenase subunit beta                                  |
| RSP4050 | NC    | 2.31  | 3720099 branched-chain alpha-keto acid dehydrogenase subunit E2              |
| RSP4051 | 4.67  | 3.37  | 3711921 hypothetical protein RSP_4051                                        |
| RSP4076 | 3.34  | 3.21  | 3711951 plamid maintenance protein                                           |
| RSP4081 | 10.36 | 4.00  | 3711955 hypothetical protein RSP_4081                                        |
| RSP4082 | 8.91  | 5.28  | 3711956 hypothetical protein RSP_4082                                        |
| RSP4098 | 2.75  | NC    | 3711965 glycosyl transferase, group 1                                        |
| RSP4112 | 9.71  | 3.86  | 3711828 hypothetical protein RSP_4112                                        |
| RSP4113 | 2.62  | NC    | 3711829 NapE component of periplasmic nitrate reductase                      |
| RSP4124 | 2.04  | 3.42  | 3711839 hypothetical protein RSP_4124                                        |
| RSP4139 | 8.57  | 3.32  | 3711988 partition parA like-protein                                          |
| RSP4154 | NC    | 3.01  | 3711873 putative transposase                                                 |
| RSP4172 | 2.88  | NC    | 3711887 hypothetical protein RSP_4172                                        |
| RSP4186 | 5.11  | 2.22  | 3711974 RepA partitioning protein/ATPase, ParA type                          |
| RSP4188 | 22.75 | 9.61  | 3711976 hypothetical protein RSP_4188                                        |
| RSP4189 | NC    | 2.16  | 3711977 TonB-dependent receptor protein                                      |
| RSP4190 | 3.41  | 2.79  | 3711978 Heme oxygenase                                                       |
| RSP4201 | 6.55  | 4.16  | 3711894 ArsR family transcriptional regulator                                |
| RSP4202 | 3.16  | 4.78  | 3711895 transporter                                                          |

|         |       |      |                                                                       |
|---------|-------|------|-----------------------------------------------------------------------|
| RSP4203 | NC    | 2.47 | 3711896 putative glutaredoxin family protein/Thio-disulfide isomerase |
| RSP4204 | NC    | 2.31 | 3711897 hypothetical protein RSP_4204                                 |
| RSP4209 | NC    | 6.61 | 3711901 acyltransferase                                               |
| RSP4210 | 3.04  | 2.45 | 3711902 ArsR family transcriptional regulator                         |
| RSP4211 | 2.04  | 2.22 | 3711903 glyceraldehyde-3-phosphate dehydrogenase                      |
| RSP4212 | NC    | 2.15 | 3711904 putative multidrug-efflux transporter                         |
| RSP4246 | NC    | 2.30 | 3711914 putative SinR-like protein                                    |
| RSP4247 | NC    | 2.93 | 3711916 hypothetical protein RSP_4247                                 |
| RSP4248 | NC    | 2.55 | 3711917 hypothetical protein RSP_4248                                 |
| RSP4254 | 3.34  | 2.81 | 4796553 nucleoside diphosphate kinase regulator                       |
| RSP4255 | 2.28  | NC   | 4796484 mechanosensitive (MS) ion channel protein                     |
| RSP4260 | 13.33 | 2.49 | 4796456 LysR family transcriptional regulator                         |
| RSP4277 | 2.34  | NC   | 4796525 MerR family transcriptional regulator                         |
| RSP4278 | 4.35  | NC   | 4796488 AraC family transcriptional regulator                         |
| RSP6029 | 2.09  | NC   | 3719350 hypothetical protein RSP_6029                                 |
| RSP6045 | 5.57  | 3.81 | 3719868 hypothetical protein RSP_6045                                 |
| RSP6048 | 2.45  | 3.13 | 3719975 hypothetical protein RSP_6048                                 |
| RSP6070 | 4.07  | 2.23 | 3720497 hypothetical protein RSP_6070                                 |
| RSP6102 | 12.72 | 5.72 | 3719374 hypothetical protein RSP_6102                                 |
| RSP6134 | 2.35  | 2.78 | 3718398 hypothetical protein RSP_6134                                 |
| RSP6154 | 3.03  | 2.34 | 3720962 hypothetical protein RSP_6154                                 |
| RSP6166 | 6.17  | 2.03 | 3721449 hypothetical protein RSP_6166                                 |
| RSP6172 | NC    | 3.25 | 3718478 hypothetical protein RSP_6152                                 |
| RSP6198 | 2.71  | 3.85 | 3722174 hypothetical protein RSP_6198                                 |
| RSP6220 | NC    | 4.22 | 3719521 hypothetical protein RSP_6220                                 |
| RSP7172 | 4.89  | 2.17 | 3711807 hypothetical protein RSP_7172                                 |

| ID      | 7 min<br>Fold change | 45 min<br>Fold change | Gene ID Description of <b>downregulated</b> genes                     |
|---------|----------------------|-----------------------|-----------------------------------------------------------------------|
| RSP0005 | 0.39                 | 0.29                  | 3720259 GMP synthase                                                  |
| RSP0007 | NC                   | 0.44                  | 3720261 putative outer membrane protein                               |
| RSP0009 | 0.48                 | NC                    | 3720263 hypothetical protein RSP_0009                                 |
| RSP0010 | 0.42                 | NC                    | 3720264 homoserine O-succinyltransferase                              |
| RSP0015 | NC                   | 0.33                  | 3720150 ABC spermidine/putrescine transporter, ATPase subunit         |
| RSP0016 | 0.36                 | NC                    | 3720151 ABC spermidine/putrescine transporter, inner membrane subunit |
| RSP0021 | NC                   | 0.44                  | 3720156 30S ribosomal protein S9                                      |
| RSP0022 | NC                   | 0.47                  | 3720157 50S ribosomal protein L13                                     |
| RSP0030 | 0.45                 | 0.23                  | 3720165 diguanylate cyclase/phosphodiesterase with PAS/PAC sensor(s)  |
| RSP0032 | 0.49                 | 0.18                  | 3720168 sigma factor FliA (sigma-28 group, flagellar)                 |
| RSP0033 | NC                   | 0.14                  | 3720111 hypothetical protein RSP_0033                                 |
| RSP0034 | 0.48                 | 0.14                  | 3720112 flagellar biosynthesis protein, FlhA                          |
| RSP0035 | 0.35                 | 0.15                  | 3720113 hypothetical protein RSP_0035                                 |
| RSP0036 | NC                   | 0.24                  | 3720115 flagellar basal-body P-ring formation protein FlgA            |
| RSP0037 | NC                   | 0.38                  | 3720116 putative FlgM, negative regulator of flagellin synthesis      |
| RSP0038 | 0.30                 | 0.04                  | 3720121 hypothetical protein RSP_0038                                 |
| RSP0041 | NC                   | 0.23                  | 3720124 hypothetical protein RSP_0041                                 |
| RSP0042 | NC                   | 0.13                  | 3720125 chemotaxis histidine protein kinase, CheA3                    |
| RSP0043 | NC                   | 0.04                  | 3720126 chemotaxis response regulator, CheY6                          |

|         |      |      |                                                                          |
|---------|------|------|--------------------------------------------------------------------------|
| RSP0044 | NC   | 0.05 | 3720127 putative cytoplasmic chemoreceptor, TlpT                         |
| RSP0045 | NC   | 0.10 | 3720128 Slp                                                              |
| RSP0046 | 0.43 | 0.07 | 3720129 CheW protein                                                     |
| RSP0047 | NC   | 0.21 | 3719954 chemotaxis methylesterase, CheB2                                 |
| RSP0048 | 0.44 | 0.21 | 3719955 MCP methyltransferase, CheR-type                                 |
| RSP0049 | 0.42 | 0.24 | 3719956 chemotaxis histidine protein kinase, CheA4                       |
| RSP0051 | 0.14 | 0.05 | 3719958 Torf protein                                                     |
| RSP0052 | 0.18 | 0.09 | 3719959 flagellar protein FliE                                           |
| RSP0053 | 0.37 | 0.18 | 3719960 flagellar FliF M-ring protein                                    |
| RSP0054 | 0.28 | 0.18 | 3719961 flagellar motor switch protein FliG                              |
| RSP0056 | NC   | 0.24 | 3719963 flagellum-specific ATPase FliI                                   |
| RSP0057 | 0.41 | 0.28 | 3719964 flagellar protein FliJ                                           |
| RSP0058 | 0.35 | 0.14 | 3719965 FliK, flagellar hook-length control protein                      |
| RSP0059 | 0.35 | 0.13 | 3719966 flagellar biosynthesis protein, FliL                             |
| RSP0061 | 0.32 | 0.18 | 3719968 flagellar motor switch FliN protein                              |
| RSP0062 | 0.31 | 0.05 | 3719969 flagellar protein FliO                                           |
| RSP0063 | 0.32 | 0.19 | 3719970 flagellar biosynthesis protein FliP                              |
| RSP0064 | 0.47 | 0.30 | 3719971 flagellar protein FliQ                                           |
| RSP0065 | NC   | 0.44 | 3719972 flagellar protein FliR                                           |
| RSP0067 | 0.49 | 0.14 | 3719935 hypothetical protein RSP_0067                                    |
| RSP0068 | 0.31 | 0.09 | 3719937 sigma-54 factor (RpoN2)                                          |
| RSP0069 | NC   | 0.48 | 3719938 flagellar filament protein                                       |
| RSP0070 | NC   | 0.46 | 3719939 flagellar hook-associated protein 2 (filament cap protein)       |
| RSP0071 | 0.40 | 0.28 | 3719940 sigma-54 dependent transcriptional regulator                     |
| RSP0072 | NC   | 0.34 | 3719941 invasion protein                                                 |
| RSP0073 | NC   | 0.29 | 3719942 flagellar hook-associated protein 3 FlgL                         |
| RSP0074 | NC   | 0.10 | 3719943 FlgK flagellar hook-associated protein 1                         |
| RSP0076 | NC   | 0.14 | 3719945 flagellar basal body P-ring protein                              |
| RSP0077 | 0.40 | 0.11 | 3719946 flagellar L-ring protein                                         |
| RSP0078 | 0.36 | 0.05 | 3719947 flagellar distal rod protein                                     |
| RSP0079 | NC   | 0.13 | 3719948 flagellar proximal rod protein FlgF                              |
| RSP0080 | 0.49 | 0.02 | 3719949 flagellar hook protein FlgE                                      |
| RSP0081 | 0.31 | 0.08 | 3719950 flagellar scaffolding protein FlgD                               |
| RSP0082 | 0.37 | 0.11 | 3719951 flagellar basal-body rod protein FlgC                            |
| RSP0083 | 0.24 | 0.07 | 3719952 flagellar proximal rod protein FlgB                              |
| RSP0084 | NC   | 0.44 | 3719953 hypothetical protein RSP_0084                                    |
| RSP0085 | NC   | 0.49 | 3719916 PAS/PAC sensor hybrid histidine kinase                           |
| RSP0086 | NC   | 0.33 | 3719917 hypothetical protein RSP_0086                                    |
| RSP0087 | NC   | 0.43 | 3719918 two component transcriptional regulator, LuxR                    |
| RSP0092 | NC   | 0.48 | 3719923 ABC sorbitol/mannitol transporter, inner membrane subunit        |
| RSP0094 | NC   | 0.30 | 3719925 ABC sorbitol/mannitol transporter, ATPase subunit                |
| RSP0095 | NC   | 0.37 | 3719926 sorbitol dehydrogenase                                           |
| RSP0097 | NC   | 0.26 | 3719929 TRAP-T family sorbitol/mannitol periplasmic binding protein SmoM |
| RSP0099 | 0.46 | 0.14 | 3719931 TRAP dicarboxylate family transporter DctQ subunit               |
| RSP0125 | 0.41 | NC   | 3719692 glucan biosynthesis protein G                                    |
| RSP0129 | 0.35 | 0.36 | 3719697 ABC D-methionine uptake transporter, ATPase subunit              |
| RSP0132 | NC   | 0.28 | 3719699 ABC D-methionine uptake transporter, substrate-binding protein   |
| RSP0146 | NC   | 0.46 | 3719567 nitrogen regulatory protein P-II                                 |

|         |      |      |                                                                                 |
|---------|------|------|---------------------------------------------------------------------------------|
| RSP0147 | NC   | 0.50 | 3719568 L-glutamine synthetase                                                  |
| RSP0154 | NC   | 0.42 | 3719538 3-hydroxyisobutyrate dehydrogenase                                      |
| RSP0155 | NC   | 0.46 | 3719539 enoyl-CoA hydratase                                                     |
| RSP0156 | NC   | 0.44 | 3719540 Acyl-CoA dehydrogenase                                                  |
| RSP0164 | 0.36 | NC   | 3719549 hypothetical protein RSP_0164                                           |
| RSP0173 | NC   | 0.39 | 3719500 2-keto-4-pentenoate hydratase/2-oxohepta-3-ene-1,7-dioic acid hydratase |
| RSP0190 | 0.37 | NC   | 3719479 biotin carboxyl carrier protein                                         |
| RSP0191 | 0.44 | NC   | 3719480 acetyl-CoA carboxylase biotin carboxylase subunit                       |
| RSP0205 | NC   | 0.43 | 3719495 hypothetical protein RSP_0205                                           |
| RSP0230 | 0.48 | 0.25 | 3719409 neutral zinc metallopeptidase                                           |
| RSP0231 | 0.48 | 0.15 | 3719411 flagellar MotB protein                                                  |
| RSP0233 | 0.35 | 0.06 | 3719412 flagellar motor protein MotA                                            |
| RSP0246 | 0.47 | NC   | 3719388 ABC lipid efflux transporter, fused ATPase and inner membrane subunits  |
| RSP0248 | 0.30 | NC   | 3719390 elongation factor P                                                     |
| RSP0282 | 0.44 | NC   | 3719194 transcriptional regulator PpsR                                          |
| RSP0294 | 0.45 | NC   | 3719207 magnesium-protoporphyrin IX monomethyl ester cyclase                    |
| RSP0296 | NC   | 0.45 | 3719209 cytochrome c2                                                           |
| RSP0377 | 0.50 | NC   | 3718885 L-glutamine synthetase                                                  |
| RSP0385 | NC   | 0.38 | 3718893 threonyl-tRNA synthetase / Ser-tRNA(Thr) hydrolase                      |
| RSP0395 | 0.43 | NC   | 3718865 RNA polymerase sigma factor RpoD                                        |
| RSP0396 | 0.42 | NC   | 3718864 hypothetical protein RSP_0396                                           |
| RSP0404 | 0.45 | 0.45 | 3718873 fructose 1,6-bisphosphatase II                                          |
| RSP0420 | 0.50 | NC   | 3718835 hypothetical protein                                                    |
| RSP0425 | 0.43 | NC   | 3718840 methionyl-tRNA synthetase                                               |
| RSP0431 | 0.49 | NC   | 3718808 putative selenocysteine lyase                                           |
| RSP0445 | 0.47 | NC   | 3718818 hypothetical protein RSP_0445                                           |
| RSP0448 | NC   | 0.44 | 3718821 EF-Tu; elongation factor Tu                                             |
| RSP0450 | NC   | 0.45 | 3718823 hypothetical protein RSP_0450                                           |
| RSP0457 | 0.47 | NC   | 3718735 glycerol-3-phosphate regulon repressor                                  |
| RSP0474 | NC   | 0.47 | 3718637 cytochrome c'                                                           |
| RSP0479 | 0.37 | NC   | 3718642 elongation factor P                                                     |
| RSP0487 | NC   | 0.40 | 3718649 TRAP dicarboxylate family transporter DctP subunit                      |
| RSP0513 | 0.32 | 0.14 | 3718426 hypothetical protein RSP_0513                                           |
| RSP0557 | 0.42 | NC   | 3717950 hypothetical protein RSP_0557                                           |
| RSP0571 | 0.49 | NC   | 3718023 tRNA pseudouridine synthase A                                           |
| RSP0576 | NC   | 0.14 | 3718028 Na <sup>+</sup> /solute symporter                                       |
| RSP0577 | NC   | 0.16 | 3718029 hypothetical protein RSP_0577                                           |
| RSP0623 | 0.32 | NC   | 3718251 hypothetical protein RSP_0623                                           |
| RSP0629 | NC   | 0.43 | 3718257 hypothetical protein RSP_0629                                           |
| RSP0651 | NC   | 0.41 | 3718300 putative inositol monophosphatase protein                               |
| RSP0652 | NC   | 0.42 | 3718301 UDP-galactose 4-epimerase                                               |
| RSP0653 | 0.47 | 0.40 | 3718302 UDP-glucose 6-dehydrogenase                                             |
| RSP0655 | 0.35 | 0.46 | 3718304 hypothetical protein RSP_0655                                           |
| RSP0657 | 0.45 | NC   | 3718306 hypothetical protein                                                    |
| RSP0669 | NC   | 0.47 | 3718279 translocation protein TolB                                              |
| RSP0671 | NC   | 0.49 | 3718281 ExbD/TolR family protein                                                |
| RSP0676 | 0.46 | 0.40 | 3718287 PhnP-like protein                                                       |
| RSP0687 | NC   | 0.45 | 3718337 HAD superfamily hydrolase                                               |
| RSP0706 | 0.40 | NC   | 3718184 prephenate dehydratase                                                  |
| RSP0714 | 0.50 | NC   | 3718078 hypothetical protein RSP_0714                                           |



|         |      |      |                                                                          |
|---------|------|------|--------------------------------------------------------------------------|
| RSP0728 | 0.39 | NC   | 3718092 hypothetical protein RSP_0728                                    |
| RSP0739 | 0.50 | NC   | 3718103 branched chain amino acid efflux pump, large (AzlC) subunit      |
| RSP0745 | NC   | 0.29 | 3718111 acetyl-CoA acetyltransferase                                     |
| RSP0747 | NC   | 0.34 | 3718112 3-oxoacyl-[acyl-carrier-protein] reductase                       |
| RSP0768 | 0.49 | 0.44 | 3718136 LuxR family transcriptional regulator                            |
| RSP0776 | NC   | 0.35 | 3718142 ABC lipoprotein efflux transporter, ATPase subunit, LoID         |
| RSP0777 | NC   | 0.49 | 3718143 ABC lipoprotein efflux transporter, inner membrane subunit, LoIE |
| RSP0778 | 0.45 | 0.48 | 3718144 prolyl-tRNA synthetase                                           |
| RSP0780 | NC   | 0.49 | 3718146 hypothetical protein RSP_0780                                    |
| RSP0818 | NC   | 0.47 | 3718396 carbamoyl phosphate synthase large subunit                       |
| RSP0831 | 0.43 | NC   | 3718371 tryptophan synthase subunit alpha                                |
| RSP0832 | 0.43 | NC   | 3718373 GTP-dependent nucleic acid-binding protein EngD                  |
| RSP0841 | 0.45 | NC   | 3718382 hypothetical protein RSP_0841                                    |
| RSP0859 | NC   | 0.49 | 3718212 3-isopropylmalate dehydrogenase                                  |
| RSP0872 | 0.27 | NC   | 3718226 peptide deformylase                                              |
| RSP0873 | 0.36 | NC   | 3718227 N-formylmethionyl tRNA deformylase                               |
| RSP0874 | 0.34 | NC   | 3718228 formylmethionine deformylase                                     |
| RSP0885 | 0.38 | NC   | 3718352 thiosulfate sulfurtransferase, rhodanese-like                    |
| RSP0899 | NC   | 0.38 | 3717962 thiol peroxidase (atypical 2-Cys peroxiredoxin)                  |
| RSP0902 | NC   | 0.46 | 3717965 hydrolase, haloacid dehalogenase-like hydrolase                  |
| RSP0910 | NC   | 0.06 | 3717973 TRAP dicarboxylate family transporter DctP subunit               |
| RSP0911 | NC   | 0.04 | 3717974 TRAP dicarboxylate family transporter DctQ subunit               |
| RSP0912 | NC   | 0.06 | 3717975 TRAP dicarboxylate family transporter DctM subunit               |
| RSP0929 | 0.46 | NC   | 3717916 acetyl-coenzyme A carboxylase carboxyl transferase subunit alpha |
| RSP0930 | 0.48 | NC   | 3717917 folylpolyglutamate synthetase                                    |
| RSP0944 | 0.43 | 0.41 | 3720772 Locus tag                                                        |
| RSP0956 | 0.43 | NC   | 3720747 hypothetical protein RSP_0956                                    |
| RSP0968 | NC   | 0.47 | 3720759 malate dehydrogenase                                             |
| RSP0970 | NC   | 0.43 | 3720761 putative citrate lyase beta chain                                |
| RSP0971 | NC   | 0.45 | 3720762 hypothetical protein                                             |
| RSP0972 | NC   | 0.42 | 3720763 hypothetical protein RSP_0972                                    |
| RSP0983 | 0.32 | 0.39 | 3720736 hypothetical protein RSP_0983                                    |
| RSP0998 | NC   | 0.31 | 3720714 Na <sup>+</sup> /H <sup>+</sup> antiporter, NhaD                 |
| RSP1001 | 0.40 | NC   | 3720717 hypothetical protein RSP_1001                                    |
| RSP1002 | 0.32 | NC   | 3720718 aspartate carbamoyltransferase catalytic subunit                 |
| RSP1003 | NC   | 0.44 | 3720719 dihydroorotase                                                   |
| RSP1009 | NC   | 0.45 | 3720725 OmpA family outer membrane protein                               |
| RSP1033 | NC   | 0.50 | 3720943 OmpA family protein                                              |
| RSP1035 | NC   | 0.37 | 3720945 FOF1 ATP synthase subunit B                                      |
| RSP1036 | NC   | 0.34 | 3720946 FOF1 ATP synthase subunit B'                                     |
| RSP1037 | NC   | 0.27 | 3720947 FOF1 ATP synthase subunit C                                      |
| RSP1038 | 0.39 | 0.30 | 3720948 FOF1 ATP synthase subunit A                                      |
| RSP1039 | 0.35 | 0.48 | 3720949 FoF1 ATP synthase, subunit I                                     |
| RSP1041 | NC   | 0.50 | 3720951 malonyl-CoA synthase                                             |
| RSP1047 | NC   | 0.49 | 3720957 16S rRNA-processing protein RimM                                 |
| RSP1048 | NC   | 0.38 | 3720900 30S ribosomal protein S16                                        |
| RSP1049 | NC   | 0.34 | 3720901 chorismate mutase                                                |
| RSP1064 | 0.36 | 0.46 | 3720917 putative inner membrane protein translocase component YidC       |

|         |      |      |         |                                                                                           |
|---------|------|------|---------|-------------------------------------------------------------------------------------------|
| RSP1068 | 0.40 | NC   | 3720883 | acetylglutamate kinase                                                                    |
| RSP1073 | 0.47 | NC   | 3720888 | CDP-diacylglycerol--glycerol-3-phosphate 3-phosphatidyltransferase                        |
| RSP1100 | 0.50 | NC   | 3720859 | bifunctional phosphoribosylaminoimidazolecarboxamide formyltransferase/IMP cyclohydrolase |
| RSP1106 | 0.45 | NC   | 3720690 | ribosome-binding factor A                                                                 |
| RSP1109 | NC   | 0.36 | 3720693 | cysteine synthase                                                                         |
| RSP1140 | NC   | 0.31 | 3720838 | branched-chain amino acid aminotransferase                                                |
| RSP1146 | NC   | 0.32 | 3718061 | glutamate synthase (NADPH) large subunit                                                  |
| RSP1147 | NC   | 0.21 | 3718062 | hypothetical protein RSP_1147                                                             |
| RSP1148 | NC   | 0.23 | 3718063 | hypothetical protein RSP_1148                                                             |
| RSP1152 | 0.24 | NC   | 3718068 | ribonuclease D                                                                            |
| RSP1153 | 0.48 | NC   | 3718069 | sugar phosphate isomerase                                                                 |
| RSP1161 | 0.35 | NC   | 3718154 | 3'-phosphadenosine 5'-phosphosulfate 3'-phosphatase                                       |
| RSP1168 | NC   | 0.46 | 3718161 | PpiC-type peptidyl-prolyl cis-trans isomerase                                             |
| RSP1169 | 0.50 | NC   | 3718162 | preprotein translocase subunit SecA                                                       |
| RSP1175 | 0.43 | NC   | 3718168 | 3-demethylubiquinone-9 3-methyltransferase                                                |
| RSP1179 | NC   | 0.46 | 3718172 | ABC sugar (xylose) transporter, inner membrane subunit                                    |
| RSP1212 | 0.44 | NC   | 3720240 | argininosuccinate synthase                                                                |
| RSP1222 | 0.42 | 0.41 | 3719670 | putative deoxyribonucleotide triphosphate pyrophosphatase                                 |
| RSP1223 | NC   | 0.43 | 3719671 | YjgF family translation initiation inhibitor                                              |
| RSP1231 | 0.47 | NC   | 3719679 | transcription termination factor Rho                                                      |
| RSP1249 | NC   | 0.35 | 3718547 | ABC ribose transporter, periplasmic solute-binding protein                                |
| RSP1279 | 0.49 | NC   | 3718193 | CbbY family protein                                                                       |
| RSP1280 | 0.39 | NC   | 3718194 | CbbX protein                                                                              |
| RSP1283 | 0.46 | NC   | 3718197 | fructose-1,6-bisphosphate aldolase                                                        |
| RSP1284 | 0.48 | NC   | 3718198 | phosphoribulokinase                                                                       |
| RSP1291 | NC   | 0.40 | 3718205 | branched chain amino acid ABC transporter periplasmic substrate-binding protein           |
| RSP1337 | 0.47 | NC   | 3720863 | 2-octaprenylphenol hydroxylase                                                            |
| RSP1340 | 0.37 | NC   | 3720866 | short chain enoyl-CoA hydratase                                                           |
| RSP1341 | 0.45 | NC   | 3720867 | 30S ribosomal protein S20                                                                 |
| RSP1351 | NC   | 0.33 | 3720876 | phosphoserine aminotransferase                                                            |
| RSP1352 | NC   | 0.22 | 3720877 | D-3-phosphoglycerate dehydrogenase                                                        |
| RSP1359 | 0.50 | NC   | 3720805 | DEAD/DEAH box helicase                                                                    |
| RSP1360 | 0.37 | 0.48 | 3720806 | hypothetical protein RSP_1360                                                             |
| RSP1365 | NC   | 0.46 | 3720811 | hypothetical protein RSP_1365                                                             |
| RSP1369 | 0.43 | NC   | 3720815 | Short-chain dehydrogenase/reductase SDR                                                   |
| RSP1376 | NC   | 0.38 | 3720783 | aspartate-semialdehyde dehydrogenase                                                      |
| RSP1377 | 0.41 | 0.34 | 3720784 | carbonic anhydrase                                                                        |
| RSP1389 | 0.40 | 0.41 | 3720796 | chorismate synthase                                                                       |
| RSP1419 | NC   | 0.50 | 3721984 | TRAP-T family transporter small inner membrane subunit                                    |
| RSP1420 | NC   | 0.42 | 3721985 | TRAP-T family transporter periplasmic binding protein                                     |
| RSP1460 | 0.40 | NC   | 3718755 | hypothetical protein RSP_1460                                                             |
| RSP1464 | 0.41 | NC   | 3718759 | periplasmic thiol-disulphide interchange protein                                          |

|         |      |      |                                                                                           |
|---------|------|------|-------------------------------------------------------------------------------------------|
| RSP1476 | NC   | 0.49 | 3718712 heavy metal-(Cd/Co/Hg/Pb/Zn)-translocating P-type ATPase                          |
| RSP1480 | 0.47 | NC   | 3718716 ABC oligopeptide transporter, inner membrane subunit OppB                         |
| RSP1512 | NC   | 0.31 | 3718676 hypothetical protein RSP_1512                                                     |
| RSP1547 | NC   | 0.48 | 3718671 bacterioferritin-associated ferredoxin                                            |
| RSP1570 | 0.47 | NC   | 3718597 phosphoribosylaminoimidazole carboxylase ATPase subunit                           |
| RSP1575 | 0.44 | 0.20 | 3718603 bifunctional sulfate adenylyltransferase subunit 1/adenylylsulfate kinase protein |
| RSP1576 | NC   | 0.50 | 3718604 thioredoxin reductase                                                             |
| RSP1577 | NC   | 0.34 | 3718605 AsnC family transcriptional regulator                                             |
| RSP1582 | NC   | 0.29 | 3718610 putative sulfate transporter/antisigma-factor antagonist                          |
| RSP1583 | 0.32 | 0.19 | 3718611 chemotaxis response regulator, CheY3                                              |
| RSP1584 | NC   | 0.20 | 3718612 chemotaxis histidine protein kinase                                               |
| RSP1585 | NC   | 0.21 | 3718613 chemotaxis protein, CheW2                                                         |
| RSP1586 | NC   | 0.21 | 3718614 chemotaxis protein, CheW3                                                         |
| RSP1587 | 0.39 | 0.17 | 3718615 chemotaxis methyltransferase, CheR2                                               |
| RSP1588 | NC   | 0.35 | 3718577 chemotaxis methylesterase, CheB1                                                  |
| RSP1589 | NC   | 0.33 | 3718578 transducer-like protein, TlpC                                                     |
| RSP1592 | NC   | 0.34 | 3718582 acyl-CoA sythetase                                                                |
| RSP1599 | NC   | 0.45 | 3718591 AMP-binding protein                                                               |
| RSP1605 | NC   | 0.25 | 3718558 TRAP dicarboxylate family transporter DctP subunit                                |
| RSP1613 | NC   | 0.35 | 3718566 TRAP dicarboxylate family transporter DctP subunit                                |
| RSP1623 | 0.26 | NC   | 3718576 hypothetical protein RSP_1623                                                     |
| RSP1628 | 0.45 | NC   | 3718524 sensor histidine protein kinase                                                   |
| RSP1670 | 0.46 | NC   | 3717936 RelA/SpoT family protein                                                          |
| RSP1674 | 0.41 | NC   | 3717940 signal peptidase I                                                                |
| RSP1691 | NC   | 0.48 | 3717996 electron transfer flavoprotein subunit beta                                       |
| RSP1700 | NC   | 0.40 | 3718912 50S ribosomal protein L7/L12                                                      |
| RSP1705 | 0.46 | NC   | 3718907 preprotein translocase subunit SecE                                               |
| RSP1709 | 0.31 | NC   | 3718917 30S ribosomal protein S7                                                          |
| RSP1710 | 0.39 | NC   | 3718916 30S ribosomal protein S12                                                         |
| RSP1716 | NC   | 0.40 | 3718921 50S ribosomal protein L3                                                          |
| RSP1717 | NC   | 0.39 | 3718922 50S ribosomal protein L4                                                          |
| RSP1718 | NC   | 0.46 | 3718923 50S ribosomal protein L23                                                         |
| RSP1720 | NC   | 0.45 | 3718925 30S ribosomal protein S19                                                         |
| RSP1721 | NC   | 0.48 | 3718926 50S ribosomal protein L22                                                         |
| RSP1722 | NC   | 0.47 | 3718927 30S ribosomal protein S3                                                          |
| RSP1723 | NC   | 0.38 | 3718928 50S ribosomal protein L16                                                         |
| RSP1725 | NC   | 0.48 | 3718931 50S ribosomal protein L14                                                         |
| RSP1726 | NC   | 0.45 | 3718932 50S ribosomal protein L24                                                         |
| RSP1727 | NC   | 0.41 | 3718933 50S ribosomal protein L5                                                          |
| RSP1728 | NC   | 0.44 | 3718934 30S ribosomal protein S14                                                         |
| RSP1729 | NC   | 0.46 | 3718935 30S ribosomal protein S8                                                          |
| RSP1730 | NC   | 0.43 | 3718936 50S ribosomal protein L6                                                          |
| RSP1731 | NC   | 0.38 | 3718937 50S ribosomal protein L18                                                         |
| RSP1732 | NC   | 0.42 | 3718938 30S ribosomal protein S5                                                          |
| RSP1733 | NC   | 0.35 | 3718939 50S ribosomal protein L30                                                         |
| RSP1735 | NC   | 0.46 | 3718941 preprotein translocase subunit SecY                                               |
| RSP1736 | NC   | 0.30 | 3718942 adenylate kinase                                                                  |

|         |      |      |                                                                                       |
|---------|------|------|---------------------------------------------------------------------------------------|
| RSP1750 | NC   | 0.38 | 3718956 ABC glutamate/glutamine/aspartate/asparagine transporter, ATPase subunit bztD |
| RSP1754 | 0.50 | NC   | 3718960 hypothetical protein                                                          |
| RSP1763 | 0.49 | NC   | 3718969 phenylalanyl-tRNA synthetase subunit alpha                                    |
| RSP1803 | 0.47 | NC   | 3719048 ABC heme exporter, inner membrane subunit CcmC                                |
| RSP1815 | 0.48 | NC   | 3719061 glutathione synthetase                                                        |
| RSP1837 | 0.46 | NC   | 3719104 5'-methylthioadenosine phosphorylase                                          |
| RSP1843 | 0.44 | NC   | 3719110 Signal recognition particle-docking protein FtsY                              |
| RSP1846 | 0.39 | NC   | 3719113 hypothetical protein RSP_1846                                                 |
| RSP1851 | NC   | 0.46 | 3719118 O-succinylhomoserine sulfhydrylase                                            |
| RSP1856 | 0.43 | NC   | 3719123 glycyl-tRNA synthetase subunit alpha                                          |
| RSP1857 | 0.34 | NC   | 3719124 hypothetical protein RSP_1857                                                 |
| RSP1865 | NC   | 0.27 | 3719132 ketol-acid reductoisomerase                                                   |
| RSP1903 | NC   | 0.38 | 3719190 putative Flp pilus assembly protein TadC                                      |
| RSP1904 | NC   | 0.33 | 3719191 putative Flp pilus assembly protein TadB                                      |
| RSP1905 | NC   | 0.40 | 3719211 putative Flp pilus assembly protein ATPase CpaF                               |
| RSP1912 | NC   | 0.24 | 3719219 hypothetical protein RSP_1912                                                 |
| RSP1913 | NC   | 0.18 | 3719220 butyryl-CoA:acetate CoA transferase                                           |
| RSP1914 | NC   | 0.21 | 3719221 3-ketoacid CoA transferase alpha subunit                                      |
| RSP1929 | 0.50 | 0.34 | 3719238 orotate phosphoribosyltransferase                                             |
| RSP1930 | 0.43 | NC   | 3719239 dihydroorotase                                                                |
| RSP1940 | 0.46 | 0.30 | 3719250 hypothetical protein RSP_1940                                                 |
| RSP1941 | 0.42 | 0.39 | 3719251 phosphoadenosine phosphosulfate reductase                                     |
| RSP1942 | 0.39 | 0.40 | 3719252 sulfite/nitrite reductase hemoprotein subunit                                 |
| RSP1943 | 0.19 | 0.26 | 3719253 hypothetical protein RSP_1943                                                 |
| RSP1944 | 0.47 | 0.45 | 3719254 uroporphyrinogen-III C-methyltransferase                                      |
| RSP1969 | 0.39 | NC   | 3719300 phosphoribosylaminoimidazole synthetase                                       |
| RSP1987 | 0.42 | 0.46 | 3719320 hypothetical protein RSP_1987                                                 |
| RSP1991 | NC   | 0.45 | 3719324 putative ornithine decarboxylase                                              |
| RSP1995 | 0.48 | NC   | 3719328 glutamyl-tRNA synthetase                                                      |
| RSP2045 | 0.45 | NC   | 3719435 hypothetical protein RSP_2045                                                 |
| RSP2047 | 0.42 | NC   | 3719437 ThiF family protein                                                           |
| RSP2098 | 0.42 | NC   | 3719532 cell division protein FtsI/penicillin-binding protein 2                       |
| RSP2099 | 0.28 | NC   | 3719533 UDP-N-acetylmuramoylalanyl-D-glutamate--2,6-diaminopimelate ligase            |
| RSP2124 | NC   | 0.46 | 3719594 methionine synthase I                                                         |
| RSP2125 | NC   | 0.42 | 3719595 hypothetical protein RSP_2125                                                 |
| RSP2127 | 0.42 | NC   | 3719597 component of phosphoribosylformylglycinamide (FGAM) synthetase                |
| RSP2128 | 0.31 | NC   | 3719598 phosphoribosylformylglycinamide synthase I                                    |
| RSP2131 | 0.45 | NC   | 3719601 RNase E                                                                       |
| RSP2192 | NC   | 0.49 | 3719665 methylmalonyl-CoA mutase                                                      |
| RSP2209 | NC   | 0.46 | 3719738 ABC sugar transporter, inner membrane subunit                                 |
| RSP2221 | NC   | 0.39 | 3719751 adenylosuccinate lyase                                                        |
| RSP2242 | 0.34 | NC   | 3719772 imidazole glycerol phosphate synthase subunit HisF                            |
| RSP2243 | 0.30 | 0.35 | 3719773 1-(5-phosphoribosyl)-5-[(5-                                                   |
| RSP2246 | 0.49 | NC   | 3719776 imidazoleglycerol-phosphate dehydratase                                       |
| RSP2256 | 0.35 | 0.31 | 3719785 D-tyrosyl-tRNA(Tyr) deacylase                                                 |
| RSP2257 | 0.39 | 0.26 | 3719786 putative fructokinase                                                         |
| RSP2258 | 0.29 | 0.21 | 3719787 phosphoribosylaminoimidazole-succinocarboxamide synthase                      |
| RSP2270 | 0.38 | NC   | 3719800 aspartyl/glutamyl-tRNA amidotransferase subunit A                             |



|         |      |      |                                                                                         |
|---------|------|------|-----------------------------------------------------------------------------------------|
| RSP2275 | NC   | 0.50 | 3719806 branched chain amino acid ABC transporter periplasmic substrate-binding protein |
| RSP2296 | 0.30 | NC   | 3719827 ATPase, delta (OSCP) subunit                                                    |
| RSP2298 | NC   | 0.47 | 3719829 F0F1 ATP synthase subunit gamma                                                 |
| RSP2301 | 0.34 | 0.49 | 3719832 phosphoribosyl pyrophosphate synthetase                                         |
| RSP2308 | 0.43 | 0.37 | 3719839 hypothetical protein RSP_2308                                                   |
| RSP2310 | NC   | 0.33 | 3719841 co-chaperonin GroES                                                             |
| RSP2311 | NC   | 0.33 | 3719842 chaperonin GroEL                                                                |
| RSP2328 | NC   | 0.45 | 3719859 rod shape-determining protein MreC                                              |
| RSP2329 | 0.35 | 0.43 | 3719860 rod shape-determining protein MreB                                              |
| RSP2342 | 0.38 | 0.43 | 3719875 xanthine-guanine phosphoribosyltransferase                                      |
| RSP2343 | 0.46 | 0.45 | 3719876 RhtB family threonine efflux protein                                            |
| RSP2344 | 0.40 | NC   | 3719877 enoyl-(acyl carrier protein) reductase                                          |
| RSP2356 | NC   | 0.49 | 3719892 hypothetical protein RSP_2356                                                   |
| RSP2365 | NC   | 0.37 | 3719902 ABC sugar (ribose) transporter, periplasmic substrate-binding subunit           |
| RSP2398 | 0.42 | NC   | 3719995 ABC putrescine transporter, inner membrane subunit                              |
| RSP2399 | 0.49 | NC   | 3719996 ABC putrescine transporter, inner membrane subunit                              |
| RSP2402 | NC   | 0.46 | 3719999 putative TonB dependent vitamin B12 outer membrane receptor                     |
| RSP2408 | 0.47 | NC   | 3720005 hypothetical protein                                                            |
| RSP2428 | NC   | 0.38 | 3720024 nicotinate-nucleotide--dimethylbenzimidazole phosphoribosyltransferase          |
| RSP2430 | NC   | 0.35 | 3720027 hypothetical protein RSP_2430                                                   |
| RSP2453 | 0.50 | NC   | 3720049 putative oxidoreductase (NAD/NADP dependent)                                    |
| RSP2454 | NC   | 0.34 | 3720050 amidophosphoribosyltransferase                                                  |
| RSP2455 | 0.36 | 0.43 | 3720051 putative colicin V production protein, dedE                                     |
| RSP2458 | NC   | 0.45 | 3720074 ABC transporter, ATPase subunit                                                 |
| RSP2459 | NC   | 0.50 | 3720075 ABC transporter, inner membrane subunit                                         |
| RSP2460 | 0.38 | NC   | 3720076 alanine racemase                                                                |
| RSP2463 | 0.43 | 0.45 | 3720078 acyl carrier protein                                                            |
| RSP2494 | 0.43 | NC   | 3720054 FUR family manganese uptake regulator                                           |
| RSP2537 | 0.41 | NC   | 3720171 peptide chain release factor 3                                                  |
| RSP2540 | 0.43 | NC   | 3720174 twin-arginine translocation system protein, TatA                                |
| RSP2541 | 0.36 | NC   | 3720175 twin-arginine translocation system protein, TatB                                |
| RSP2584 | NC   | 0.45 | 3720217 hypothetical protein RSP_2584                                                   |
| RSP2585 | NC   | 0.30 | 3720218 hypothetical protein RSP_2585                                                   |
| RSP2595 | NC   | 0.50 | 3720267 hypothetical protein RSP_2595                                                   |
| RSP2613 | 0.45 | NC   | 3720286 putative glycerol-3-phosphate acyltransferase PlsX                              |
| RSP2615 | 0.19 | NC   | 3720288 hypothetical protein RSP_2615                                                   |
| RSP2619 | 0.47 | NC   | 3720292 tRNA-specific 2-thiouridylase MnmA                                              |
| RSP2654 | 0.31 | 0.45 | 3720345 DnaK suppressor protein                                                         |
| RSP2683 | NC   | 0.47 | 3720374 hypothetical protein RSP_2683                                                   |
| RSP2686 | 0.47 | 0.44 | 3720377 putative sarcosine oxidase beta subunit                                         |
| RSP2712 | 0.49 | NC   | 3720443 (3R)-hydroxymyristoyl-ACP dehydratase                                           |
| RSP2737 | NC   | 0.37 | 3720466 putative ssRNA endoribonuclease L-PSP                                           |
| RSP2738 | 0.42 | 0.35 | 3720467 rhodanese-related sulfurtransferase                                             |
| RSP2739 | NC   | 0.47 | 3720468 hypothetical protein RSP_2739                                                   |
| RSP2747 | NC   | 0.44 | 3720477 glycosyltransferase                                                             |
| RSP2781 | 0.44 | 0.41 | 3720514 peroxiredoxin/glutaredoxin family protein                                       |
| RSP2783 | 0.49 | NC   | 3720516 lipoyl synthase                                                                 |

|         |      |      |                                                                                 |
|---------|------|------|---------------------------------------------------------------------------------|
| RSP2805 | NC   | 0.45 | 3720588 putative NADH-flavin oxidoreductase                                     |
| RSP2822 | NC   | 0.45 | 3720568 putative precorrin methylase                                            |
| RSP2828 | 0.42 | NC   | 3720561 cobalamin synthesis protein CobW                                        |
| RSP2848 | 0.42 | NC   | 3720538 delta-aminolevulinic acid dehydratase                                   |
| RSP2852 | 0.45 | NC   | 3720534 polyketide biosynthesis associated protein                              |
| RSP2860 | NC   | 0.34 | 3720526 30S ribosomal protein S2                                                |
| RSP2861 | NC   | 0.31 | 3720525 elongation factor Ts                                                    |
| RSP2868 | NC   | 0.42 | 3720608 inosine-5'-monophosphate dehydrogenase                                  |
| RSP2875 | 0.47 | NC   | 3720615 glucokinase                                                             |
| RSP2876 | NC   | 0.41 | 3720616 putative carbon monoxide dehydrogenase medium chain                     |
| RSP2877 | NC   | 0.22 | 3720617 xanthine dehydrogenase, molybdenum binding subunit apoprotein           |
| RSP2878 | NC   | 0.13 | 3720618 putative carbon-monoxide dehydrogenase small chain                      |
| RSP2879 | NC   | 0.49 | 3720619 hypothetical protein RSP_2879                                           |
| RSP2886 | NC   | 0.45 | 3720626 glucose-1-phosphate adenyltransferase                                   |
| RSP2894 | NC   | 0.48 | 3720633 nucleoside diphosphate kinase                                           |
| RSP2895 | 0.44 | NC   | 3720634 putative ABC transporter, fused ATPase subunits                         |
| RSP2908 | 0.47 | NC   | 3720648 hypothetical protein RSP_2908                                           |
| RSP2910 | 0.36 | NC   | 3720650 metal-dependent amidase/aminoacylase/carboxypeptidase                   |
| RSP2913 | 0.48 | NC   | 3720652 ABC Fe+3 siderophore transporter, periplasmic substrate-binding protein |
| RSP2918 | 0.48 | 0.44 | 3720657 ferripyochelin binding protein                                          |
| RSP2919 | 0.43 | NC   | 3720658 guanylate kinase                                                        |
| RSP2921 | NC   | 0.47 | 3720661 3-deoxy-D-arabinoheptulosonate-7-phosphate synthase                     |
| RSP2922 | 0.49 | NC   | 3720662 transcriptional regulator                                               |
| RSP2950 | NC   | 0.23 | 3720402 LysR family transcriptional regulator                                   |
| RSP2951 | NC   | 0.41 | 3720403 phosphoribosylformylglycinamide synthase II                             |
| RSP2956 | NC   | 0.38 | 3720408 transketolase                                                           |
| RSP2959 | NC   | 0.32 | 3720411 glyceraldehyde-3-phosphate dehydrogenase                                |
| RSP2974 | 0.35 | 0.41 | 3720388 putative metallopeptidase                                               |
| RSP2975 | 0.37 | 0.38 | 3720389 hypothetical protein RSP_2975                                           |
| RSP2985 | 0.47 | NC   | 3720399 hypothetical protein RSP_2985                                           |
| RSP3003 | 0.44 | NC   | 3721590 hypothetical protein                                                    |
| RSP3083 | NC   | 0.41 | 3721359 methyl accepting chemotaxis protein                                     |
| RSP3090 | 0.36 | NC   | 3721366 putative alkylphosphonate uptake protein, phnA                          |
| RSP3102 | 0.42 | 0.29 | 3721377 Sec-independent protein translocase TatE                                |
| RSP3136 | NC   | 0.22 | 3721428 hypothetical protein                                                    |
| RSP3161 | NC   | 0.45 | 3721453 hypothetical protein RSP_3161                                           |
| RSP3174 | NC   | 0.34 | 3721465 NCS1 nucleoside transporter                                             |
| RSP3186 | NC   | 0.41 | 3721477 hypothetical protein RSP_3186                                           |
| RSP3187 | 0.49 | 0.12 | 3721479 glucan biosynthesis protein D                                           |
| RSP3302 | 0.46 | 0.12 | 3722004 chemotaxis response regulator, CheY4                                    |
| RSP3303 | 0.47 | 0.28 | 3722005 putative methyl accepting chemotaxis protein, McpG                      |
| RSP3349 | 0.41 | NC   | 3722049 hypothetical protein                                                    |
| RSP3361 | 0.44 | NC   | 3722061 putative restriction endonuclease or methylase                          |
| RSP3382 | NC   | 0.48 | 3721667 hypothetical protein RSP_3382                                           |
| RSP3432 | NC   | 0.29 | 3721718 methyl-accepting chemotaxis protein                                     |
| RSP3500 | NC   | 0.40 | 3721917 ABC sugar transporter, periplasmic binding protein                      |
| RSP3513 | 0.48 | NC   | 3721929 diguanylate cyclase with GAF sensor                                     |

|         |      |      |                                                                  |
|---------|------|------|------------------------------------------------------------------|
| RSP3539 | NC   | 0.20 | 3721953 hemolysin-type calcium-binding region, RTX               |
| RSP3540 | 0.45 | 0.16 | 3721954 putative adhesin or RTX toxin                            |
| RSP3551 | 0.47 | NC   | 3721965 histidyl-tRNA synthetase                                 |
| RSP3557 | NC   | 0.44 | 3721971 ABC transporter ATPase                                   |
| RSP3593 | NC   | 0.41 | 3722110 tRNA (guanine-N(7))-methyltransferase                    |
| RSP3600 | 0.48 | NC   | 3722117 tRNA-i(6)A37 thiotransferase enzyme MiaB                 |
| RSP3640 | 0.33 | 0.28 | 3722129 hypothetical protein RSP_3640                            |
| RSP3641 | 0.32 | 0.35 | 3722130 pfkB family carbohydrate kinase                          |
| RSP3642 | 0.33 | 0.39 | 3722131 putative ExsB                                            |
| RSP3643 | 0.36 | 0.49 | 3722132 hypothetical protein RSP_3643                            |
| RSP3644 | 0.29 | 0.34 | 3722133 metal dependent phosphohydrolase                         |
| RSP3696 | 0.40 | NC   | 3722186 ABC sulfate/thiosulfate transporter, ATPase subunit CysA |
| RSP3750 | 0.25 | NC   | 3721509 hypothetical protein RSP_3750                            |
| RSP3751 | 0.35 | NC   | 3721510 hypothetical protein RSP_3751                            |
| RSP3752 | 0.29 | NC   | 3721511 hypothetical protein RSP_3752                            |
| RSP3755 | 0.31 | NC   | 3721514 hypothetical protein                                     |
| RSP3756 | 0.25 | NC   | 3721515 hypothetical protein RSP_3756                            |
| RSP3768 | NC   | 0.48 | 3721523 hypothetical protein RSP_3768                            |
| RSP3825 | 0.42 | NC   | 3721406 hypothetical protein RSP_3825                            |
| RSP3835 | 0.41 | NC   | 3721417 hypothetical protein RSP_3835                            |
| RSP3838 | 0.36 | 0.50 | 4796555 capsule polysaccharide export protein                    |
| RSP3844 | 0.50 | NC   | 4796551 dTDP-glucose 4,6-dehydratase                             |
| RSP3924 | 0.43 | 0.48 | 4796490 hypothetical protein RSP_3924                            |
| RSP3925 | 0.23 | NC   | 4796526 hypothetical protein RSP_3925                            |
| RSP3982 | NC   | 0.43 | 3711815 hypothetical protein RSP_3982                            |
| RSP3983 | NC   | 0.36 | 3711814 circadian clock KaiB-like protein                        |
| RSP3985 | NC   | 0.32 | 3711812 hypothetical protein RSP_3985                            |
| RSP3986 | 0.49 | 0.42 | 3711811 hypothetical protein RSP_3986                            |
| RSP3988 | 0.35 | NC   | 3711810 glycosyltransferase                                      |
| RSP3989 | 0.42 | NC   | 3711808 NAD-dependent epimerase/dehydratase                      |
| RSP4039 | 0.49 | 0.37 | 3711797 hypothetical protein RSP_4039                            |
| RSP4039 | 0.49 | 0.37 | 3720104 phosphoglycerate kinase                                  |
| RSP4044 | NC   | 0.43 | 3720101 pyruvate dehydrogenase E1 component, alpha subunit       |
| RSP4068 | 0.49 | NC   | 3711942 hypothetical protein                                     |
| RSP4070 | 0.37 | NC   | 3711944 putative signal peptide protein                          |
| RSP4159 | 0.46 | NC   | 3711877 isopropylmalate/homocitrate synthase                     |
| RSP4160 | 0.22 | NC   | 3711878 hypothetical protein RSP_4160                            |
| RSP4161 | 0.37 | NC   | 3711879 O-acetylhomoserine sulfhydrylase                         |
| RSP4195 | 0.39 | NC   | 3711983 response regulator receiver protein                      |
| RSP4219 | NC   | 0.39 | 3711909 hypothetical protein RSP_4219                            |
| RSP4220 | 0.47 | 0.41 | 3711910 hypothetical protein RSP_4220                            |
| RSP4221 | 0.48 | 0.42 | 3711997 hypothetical protein RSP_4221                            |
| RSP4242 | NC   | 0.47 | 3711914 hemolysin-type calcium-binding protein                   |
| RSP6025 | NC   | 0.08 | 3719217 hypothetical protein RSP_6025                            |
| RSP6078 | 0.47 | NC   | 3720645 hypothetical protein RSP_6078                            |
| RSP6086 | 0.40 | 0.20 | 3720114 hypothetical protein RSP_6086                            |
| RSP6087 | NC   | 0.33 | 3720117 hypothetical protein RSP_6087                            |
| RSP6092 | NC   | 0.26 | 3719936 hypothetical protein RSP_6092                            |
| RSP6098 | 0.29 | 0.33 | 3719541 hypothetical protein RSP_6098                            |
| RSP6151 | NC   | 0.27 | 3718549 hypothetical protein RSP_6151                            |
| RSP6212 | 0.29 | NC   | 3718384 hypothetical protein RSP_6212                            |

|         |      |      |                                       |
|---------|------|------|---------------------------------------|
| RSP7124 | 0.47 | NC   | 3711809 hypothetical protein RSP_7124 |
| RSP7252 | 0.44 | 0.43 | 3711936 hypothetical protein RSP_7252 |

All genes that passed the selection criteria (FDR<0.05 and fold-change in average values =<0.5 or >=2.0 compared to 0 min NaCl) at least at one time point are shown.

NC, genes that did not pass the selection criteria are shown as 'not changed'.
