# Supplementary material
Source: PubMed Central journal article supplement (PMC3209165)
Supplement: supp_77.21.7551_AEM05463-11_sup02.pdf [file supp_77.21.7551_AEM05463-11_sup02.pdf]

**Table S2. Salt-responsive transcription factor genes.**

| ID             | 7 min       |             | 45 min         |                                                     | Gene ID | Description of <b>upregulated</b> genes |
|----------------|-------------|-------------|----------------|-----------------------------------------------------|---------|-----------------------------------------|
|                | Fold change | Fold change | Fold change    | Fold change                                         |         |                                         |
| <b>RSP0018</b> | <b>2.5</b>  | <b>8.6</b>  | <b>3720153</b> | <b>GntR family transcriptional regulator</b>        |         |                                         |
| RSP0171        | 5.8         | 2.2         | 3719498        | response regulator receiver protein                 |         |                                         |
| RSP0283        | NC          | 2.4         | 3719195        | regulatory protein, PpaA                            |         |                                         |
| RSP0316        | 2.1         | NC          | 3719076        | LuxR family transcriptional regulator               |         |                                         |
| RSP0402        | NC          | 2.2         | 3718871        | TetR family transcriptional regulator               |         |                                         |
| RSP0443        | 2.6         | 2.8         | 3718816        | BadM/Rrf2 family transcriptional regulator          |         |                                         |
| RSP0527        | NC          | 3.6         | 3718440        | sigma-54 factor (RpoN1)                             |         |                                         |
| RSP0601        | 3.6         | 4.3         | 3718015        | RNA polymerase factor sigma-32                      |         |                                         |
| RSP0641        | 4.5         | 2.8         | 3718290        | XRE family transcriptional regulator                |         |                                         |
| RSP0760        | 4.3         | 3.4         | 3718128        | MarR family transcriptional regulator               |         |                                         |
| RSP0762        | 4.74        | 3.19        | 3718130        | XRE family transcriptional regulator                |         |                                         |
| RSP0868        | 7.2         | 2.2         | 3718222        | putative transcriptional regulator                  |         |                                         |
| RSP0991        | 4.3         | NC          | 3720707        | ROK family transcriptional regulator                |         |                                         |
| RSP1083        | 3.7         | NC          | 3720842        | two component transcriptional regulator             |         |                                         |
| RSP1139        | 2.5         | NC          | 3720837        | MarR family transcriptional regulator               |         |                                         |
| RSP1191        | NC          | 2.1         | 3718855        | MarR family transcriptional regulator               |         |                                         |
| RSP1220        | 3.9         | NC          | 3719668        | heat-inducible transcription repressor              |         |                                         |
| RSP1272        | 5.4         | 4.4         | 3718475        | RNA polymerase sigma factor                         |         |                                         |
| RSP1274        | 2.8         | 2.4         | 3718477        | two-component response regulator                    |         |                                         |
| <b>RSP1275</b> | <b>3.1</b>  | <b>4.6</b>  | <b>3718479</b> | <b>CrpO</b>                                         |         |                                         |
| RSP1286        | 7.6         | 3.6         | 3718200        | RuBisCO operon transcriptional regulator, CbbR      |         |                                         |
| RSP1297        | NC          | 2.5         | 3718211        | LysR family transcriptional regulator               |         |                                         |
| <b>RSP1435</b> | <b>38.8</b> | <b>5.6</b>  | <b>3718802</b> | <b>TetR family regulatory protein</b>               |         |                                         |
| RSP1441        | 2.2         | NC          | 3718774        | GntR family regulatory protein                      |         |                                         |
| RSP1486        | 13.0        | 3.3         | 3718723        | TetR family transcriptional regulator               |         |                                         |
| RSP1607        | 4.0         | NC          | 3718560        | GntR family transcriptional regulator               |         |                                         |
| RSP1785        | NC          | 2.2         | 3719011        | Lacl family transcription regulator                 |         |                                         |
| RSP1790        | 2.7         | 2.2         | 3719016        | transcriptional regulator                           |         |                                         |
| RSP1890        | 4.6         | 4.8         | 3719177        | LysR family transcriptional regulator               |         |                                         |
| <b>RSP1945</b> | <b>11.3</b> | <b>6.5</b>  | <b>3719255</b> | <b>AsnC family transcriptional regulator</b>        |         |                                         |
| RSP1990        | 5.1         | NC          | 3719323        | AsnC family transcriptional regulator               |         |                                         |
| RSP1997        | 2.34        | NC          | 3719330        | LexA repressor                                      |         |                                         |
| RSP2075        | 4.0         | NC          | 3719468        | putative transcriptional regulator                  |         |                                         |
| RSP2171        | 3.4         | NC          | 3719640        | LysR family transcriptional regulator               |         |                                         |
| RSP2186        | NC          | 3.0         | 3719656        | MerR family transcriptional regulator               |         |                                         |
| RSP2234        | 5.0         | 2.4         | 3719763        | DNA-binding protein                                 |         |                                         |
| RSP2236        | NC          | 2.8         | 3719765        | MarR family transcriptional regulator               |         |                                         |
| RSP2324        | 2.1         | NC          | 3719855        | RpiR family transcriptional regulator               |         |                                         |
| RSP2425        | 3.1         | NC          | 3720022        | CarD family transcriptional regulator               |         |                                         |
| RSP2572        | NC          | 2.0         | 3720205        | crpK, Fnr-type transcriptional regulator            |         |                                         |
| RSP2591        | 4.6         | NC          | 3720224        | two component LuxR family transcriptional regulator |         |                                         |
| RSP2599        | NC          | 3.0         | 3720271        | phosphate regulon transcriptional regulator, PhoR   |         |                                         |
| RSP2610        | 4.0         | NC          | 3720283        | MerR family transcriptional regulator               |         |                                         |
| RSP2611        | 4.7         | NC          | 3720284        | integration host factor subunit alpha               |         |                                         |
| RSP2681        | 8.3         | 5.6         | 3720372        | sigma factor, RpoE                                  |         |                                         |
| RSP2780        | 3.8         | 2.4         | 3720513        | LysR family transcriptional regulator               |         |                                         |
| RSP2801        | 16.0        | 4.7         | 3720592        | TetR family transcriptional regulator               |         |                                         |
| RSP2932        | 2.1         | NC          | 3720672        | GntR family transcriptional regulator               |         |                                         |
| RSP3022        | 8.5         | NC          | 3721607        | TetR family transcriptional regulator               |         |                                         |
| RSP3042        | NC          | 3.0         | 3721627        | LuxR family transcriptional regulator               |         |                                         |
| RSP3124        | 3.6         | 2.6         | 3721579        | LysR family transcriptional regulator               |         |                                         |
| RSP3125        | 10.2        | 2.9         | 3721580        | ArsR family transcriptional regulator               |         |                                         |
| RSP3179        | 10.6        | 3.4         | 3721470        | ferric-uptake regulator                             |         |                                         |
| RSP3324        | 2.4         | 2.5         | 3722024        | LuxR family transcriptional regulator               |         |                                         |
| RSP3385        | 2.1         | NC          | 3721670        | LysR family transcriptional regulator               |         |                                         |
| RSP3405        | 2.1         | NC          | 3721690        | GntR family transcriptional regulator               |         |                                         |
| RSP3569        | NC          | 2.0         | 3722084        | Zinc-uptake regulator, Zur                          |         |                                         |
| RSP3606        | 4.1         | 3.2         | 3721764        | sigma-54 factor (RpoN3)                             |         |                                         |
| RSP3676        | 6.9         | NC          | 3722165        | GntR family transcriptional regulator               |         |                                         |
| RSP3700        | 2.9         | NC          | 3722190        | Lacl family transcription regulator                 |         |                                         |
| RSP3731        | 3.4         | NC          | 3721492        | DeoR family transcriptional regulator               |         |                                         |
| RSP3865        | 2.8         | 2.7         | 4796516        | BadM/Rrf2 family transcriptional regulator          |         |                                         |
| RSP3971        | 3.6         | 2.6         | 3712013        | GntR family transcriptional regulator               |         |                                         |
| RSP4038        | 3.5         | NC          | 3711798        | DeoR family transcriptional regulator               |         |                                         |
| RSP4201        | 6.6         | 4.2         | 3711894        | ArsR family transcriptional regulator               |         |                                         |
| RSP4210        | 3.0         | 2.4         | 3711902        | ArsR family transcriptional regulator               |         |                                         |
| RSP4246        | NC          | 2.30        | 3711914        | putative SinR-like protein                          |         |                                         |
| RSP4260        | 13.3        | 2.5         | 4796456        | LysR family transcriptional regulator               |         |                                         |
| RSP4277        | 2.3         | NC          | 4796525        | MerR family transcriptional regulator               |         |                                         |
| RSP4278        | 4.4         | NC          | 4796488        | AraC family transcriptional regulator               |         |                                         |

| ID      | 7 min       |             | 45 min      |                                               | Gene ID | Description of <b>downregulated</b> genes |
|---------|-------------|-------------|-------------|-----------------------------------------------|---------|-------------------------------------------|
|         | Fold change | Fold change | Fold change | Fold change                                   |         |                                           |
| RSP0032 | 0.49        | 0.18        | 3720168     | sigma factor FlIA (sigma-28 group, flagellar) |         |                                           |
| RSP0068 | 0.31        | 0.09        | 3719937     | sigma-54 factor (RpoN2)                       |         |                                           |
| RSP0071 | 0.40        | 0.28        | 3719940     | sigma-54 dependent transcriptional regulator  |         |                                           |
| RSP0087 | NC          | 0.43        | 3719918     | two component transcriptional regulator, LuxR |         |                                           |
| RSP0146 | NC          | 0.46        | 3719567     | nitrogen regulatory protein P-II              |         |                                           |
| RSP0282 | 0.44        | NC          | 3719194     | transcriptional regulator PpsR                |         |                                           |
| RSP0395 | 0.43        | NC          | 3718865     | RNA polymerase sigma factor RpoD              |         |                                           |
| RSP0768 | 0.49        | 0.44        | 3718136     | LuxR family transcriptional regulator         |         |                                           |
| RSP1577 | NC          | 0.34        | 3718605     | AsnC family transcriptional regulator         |         |                                           |
| RSP2494 | 0.43        | NC          | 3720054     | FUR family manganese uptake regulator         |         |                                           |
| RSP2922 | 0.49        | NC          | 3720662     | transcriptional regulator                     |         |                                           |
| RSP2950 | NC          | 0.23        | 3720402     | LysR family transcriptional regulator         |         |                                           |
| RSP4195 | 0.39        | NC          | 3711983     | response regulator receiver protein           |         |                                           |

Transcription factors whose role in salt tolerance has been tested in this study are shown in bold.
